# Supplementary material for: Theoretical investigation of the A1Π–X1Σ+, B1Σ+–X1Σ+, C1Σ+–X1Σ+, and E1Π–X1Σ+ transitions of the CO molecule
Source: Royal Society of Chemistry journal article supplement (doi:10.1039/d4cp03418j), 2024-12-27
Supplement: d4cp03418j2.zip [file d4cp03418j2.zip]

## Sheet: A-X
	64764.2	2.79674e-16
	66291.1	6.15338e-16
	67739.5	7.9777e-16
	69124.2	7.9165e-16
	70456.6	6.59746e-16
	71744.4	4.81451e-16
	72992.6	3.14126e-16
	74204.1	1.85247e-16
	75380.6	9.93286e-17
	76522.5	4.86142e-17
	77629.3	2.1788e-17
	78699.9	8.97851e-18
	79732	3.42267e-18
	80722.5	1.21759e-18
	81667	4.09455e-19
	82559.9	1.3262e-19
	83394.4	4.25238e-20
	84162.3	1.40329e-20
	84853.7	5.00308e-21
	85456.1	2.01176e-21
	85510.7	1.37872e-30
	85646.3	1.19265e-29
	85797.2	1.00149e-27
	62576	9.12673e-23
	64102.9	7.54889e-23
	65551.3	1.87357e-23
	66936.1	5.39396e-25
	68268.4	2.45429e-23
	69556.2	5.94164e-23
	70804.4	8.01324e-23
	72016	8.01372e-23
	73192.5	6.56378e-23
	74334.3	4.61799e-23
	75441.1	2.8701e-23
	76511.7	1.60787e-23
	77543.8	8.25877e-24
	78534.3	3.95586e-24
	79478.8	1.79846e-24
	80371.7	7.90895e-25
	81206.2	3.43262e-25
	81974.1	1.50062e-25
	82665.5	6.73063e-26
	83267.9	3.13114e-26
	83322.6	2.16463e-35
	83458.2	1.91062e-34
	83609.1	1.62734e-32
	60415.4	1.67394e-29
	61942.3	1.12968e-30
	63390.7	3.41296e-30
	64775.5	8.91858e-30
	66107.8	6.05915e-30
	67395.6	9.59e-31
	68643.8	5.47394e-31
	69855.4	4.79884e-30
	71031.8	9.76935e-30
	72173.7	1.23141e-29
	73280.5	1.18337e-29
	74351.1	9.44867e-30
	75383.2	6.57891e-30
	76373.7	4.13095e-30
	77318.2	2.40284e-30
	78211.1	1.32552e-30
	79045.6	7.08121e-31
	79813.5	3.73177e-31
	80504.9	1.96811e-31
	81107.3	1.04523e-31
	81162	7.30803e-41
	81297.6	6.63483e-40
	81448.5	5.82247e-38
	58252.6	1.78603e-36
	59779.5	4.76609e-37
	61227.9	1.41122e-36
	62612.7	2.15182e-37
	63945	2.41029e-37
	65232.8	1.09021e-36
	66481	1.06641e-36
	67692.6	3.50059e-37
	68869.1	1.38413e-39
	70010.9	4.04891e-37
	71117.8	1.1491e-36
	72188.3	1.69092e-36
	73220.4	1.80455e-36
	74210.9	1.57596e-36
	75155.4	1.20053e-36
	76048.4	8.31653e-37
	76882.9	5.40229e-37
	77650.7	3.36772e-37
	78342.1	2.04875e-37
	78944.5	1.22424e-37
	78999.2	8.64853e-47
	79134.8	8.05592e-46
	79285.7	7.26968e-44
	56065.9	1.0162e-43
	57592.8	2.20346e-43
	59041.2	2.52285e-44
	60426	8.77239e-44
	61758.3	1.47177e-43
	63046.1	2.24586e-44
	64294.3	2.64121e-44
	65505.9	1.29552e-43
	66682.3	1.3967e-43
	67824.2	5.58729e-44
	68931	6.66814e-46
	70001.6	3.3241e-44
	71033.7	1.155e-43
	72024.2	1.84847e-43
	72968.7	2.1027e-43
	73861.6	1.95915e-43
	74696.1	1.60468e-43
	75464	1.20571e-43
	76155.4	8.53556e-44
	76757.8	5.76039e-44
	77099	3.65114e-50
	55380.4	2.2105e-50
	58213.5	1.53537e-50
	60833.7	1.23948e-50
	62081.8	1.2861e-50
	65611.8	1.43152e-50
	66718.6	1.44459e-50
	71649.2	1.56329e-50
	72483.7	1.85236e-50
	73251.6	1.80862e-50
	73943	1.55723e-50
	74545.3	1.21936e-50
	64760.3	4.08115e-16
	66287.2	8.97827e-16
	67735.6	1.16391e-15
	69120.4	1.15481e-15
	70452.7	9.6235e-16
	71740.5	7.02219e-16
	72988.7	4.58125e-16
	74200.3	2.70135e-16
	75376.8	1.4484e-16
	76518.6	7.08783e-17
	77625.5	3.17625e-17
	78696	1.30875e-17
	79728.1	4.98826e-18
	80718.6	1.77417e-18
	81663.1	5.96498e-19
	82556.1	1.93152e-19
	83390.5	6.19116e-20
	84158.4	2.0423e-20
	84849.8	7.27876e-21
	85452.2	2.92591e-21
	85506.9	2.00519e-30
	85642.5	1.73446e-29
	85793.4	1.4564e-27
	62572.2	1.33196e-22
	64099.1	1.10136e-22
	65547.5	2.73163e-23
	66932.2	7.91627e-25
	68264.6	3.58404e-23
	69552.4	8.67284e-23
	70800.6	1.16942e-22
	72012.1	1.16931e-22
	73188.6	9.57616e-23
	74330.5	6.73646e-23
	75437.3	4.18639e-23
	76507.9	2.34494e-23
	77540	1.20434e-23
	78530.5	5.76783e-24
	79475	2.6219e-24
	80367.9	1.15286e-24
	81202.4	5.00295e-25
	81970.3	2.18682e-25
	82661.7	9.80669e-26
	83264.1	4.56154e-26
	83318.7	3.15344e-35
	83454.3	2.78336e-34
	83605.2	2.37047e-32
	60411.6	2.44334e-29
	61938.5	1.64664e-30
	63386.9	4.98562e-30
	64771.7	1.30193e-29
	66104	8.84083e-30
	67391.8	1.3972e-30
	68640	8.01182e-31
	69851.6	7.01032e-30
	71028.1	1.42649e-29
	72169.9	1.79767e-29
	73276.8	1.72725e-29
	74347.3	1.37892e-29
	75379.4	9.59995e-30
	76369.9	6.02711e-30
	77314.4	3.50548e-30
	78207.4	1.93354e-30
	79041.9	1.03286e-30
	79809.7	5.44234e-31
	80501.1	2.87003e-31
	81103.5	1.5241e-31
	81158.2	1.06561e-40
	81293.8	9.6743e-40
	81444.7	8.48953e-38
	58248.9	2.6078e-36
	59775.8	6.96608e-37
	61224.2	2.06077e-36
	62609	3.13785e-37
	63941.3	3.52503e-37
	65229.1	1.59262e-36
	66477.3	1.55694e-36
	67688.9	5.10618e-37
	68865.4	2.06896e-39
	70007.2	5.9203e-37
	71114	1.67909e-36
	72184.6	2.46996e-36
	73216.7	2.63544e-36
	74207.2	2.30122e-36
	75151.7	1.75282e-36
	76044.6	1.21413e-36
	76879.1	7.88588e-37
	77647	4.91568e-37
	78338.4	2.99014e-37
	78940.8	1.78665e-37
	78995.5	1.26213e-46
	79131.1	1.17566e-45
	79282	1.06092e-43
	56062.3	1.48436e-43
	57589.2	3.22013e-43
	59037.6	3.68108e-44
	60422.3	1.28267e-43
	61754.7	2.15015e-43
	63042.5	3.27577e-44
	64290.7	3.86605e-44
	65502.2	1.89374e-43
	66678.7	2.04047e-43
	67820.6	8.1558e-44
	68927.4	9.62319e-46
	69998	4.86565e-44
	71030.1	1.68901e-43
	72020.6	2.70202e-43
	72965.1	3.07296e-43
	73858	2.86277e-43
	74692.5	2.34456e-43
	75460.4	1.76142e-43
	76151.8	1.24683e-43
	76754.2	8.41402e-44
	77095.3	5.33304e-50
	55376.8	3.23163e-50
	58210	2.24451e-50
	60830.1	1.81308e-50
	62078.3	1.87983e-50
	65608.2	2.09376e-50
	66715.1	2.11177e-50
	70752.7	1.37162e-50
	71645.7	2.28695e-50
	72480.1	2.70918e-50
	73248	2.64476e-50
	73939.4	2.27692e-50
	74541.8	1.78281e-50
	64766.7	4.07805e-16
	66293.5	8.97361e-16
	67741.8	1.16357e-15
	69126.4	1.15484e-15
	70458.7	9.62576e-16
	71746.3	7.02593e-16
	72994.4	4.58508e-16
	74205.9	2.70463e-16
	75382.3	1.4507e-16
	76524.1	7.10235e-17
	77630.8	3.18442e-17
	78701.3	1.31288e-17
	79733.3	5.00717e-18
	80723.6	1.78227e-18
	81668	5.9971e-19
	82560.7	1.94373e-19
	83395	6.23626e-20
	84162.7	2.05922e-20
	84853.8	7.34799e-21
	85455.9	2.96362e-21
	85507.9	2.20162e-30
	85643.5	1.76132e-29
	85794.5	1.48402e-27
	62578.6	1.33146e-22
	64105.4	1.10171e-22
	65553.6	2.73742e-23
	66938.3	7.78576e-25
	68270.5	3.57572e-23
	69558.2	8.66354e-23
	70806.3	1.16891e-22
	72017.8	1.16941e-22
	73194.2	9.5813e-23
	74336	6.74318e-23
	75442.7	4.19256e-23
	76513.1	2.34946e-23
	77545.1	1.20729e-23
	78535.5	5.78514e-24
	79479.8	2.63105e-24
	80372.6	1.15758e-24
	81206.9	5.02645e-25
	81974.5	2.19855e-25
	82665.7	9.8704e-26
	83267.8	4.60742e-26
	83319.8	3.45135e-35
	83455.4	2.81802e-34
	83606.3	2.40918e-32
	60418	2.44334e-29
	61944.8	1.65281e-30
	63393.1	4.97471e-30
	64777.7	1.30152e-29
	66110	8.8512e-30
	67397.6	1.40529e-30
	68645.8	7.94102e-31
	69857.2	6.99156e-30
	71033.6	1.42472e-29
	72175.4	1.79689e-29
	73282.1	1.72758e-29
	74352.6	1.37993e-29
	75384.6	9.6123e-30
	76374.9	6.03781e-30
	77319.3	3.51339e-30
	78212	1.93883e-30
	79046.3	1.0362e-30
	79814	5.46339e-31
	80505.1	2.88437e-31
	81107.2	1.53727e-31
	81159.2	1.16393e-40
	81294.8	9.77576e-40
	81445.8	8.61468e-38
	58255.3	2.60888e-36
	59782.1	6.94979e-37
	61230.4	2.06117e-36
	62615	3.15163e-37
	63947.3	3.50898e-37
	65234.9	1.59112e-36
	66483	1.55821e-36
	67694.5	5.12669e-37
	68870.9	1.90167e-39
	70012.7	5.89271e-37
	71119.4	1.67557e-36
	72189.9	2.46771e-36
	73221.9	2.63507e-36
	74212.2	2.30235e-36
	75156.6	1.75461e-36
	76049.3	1.21604e-36
	76883.6	7.9018e-37
	77651.3	4.9289e-37
	78342.4	3.00172e-37
	78944.5	1.80029e-37
	78996.5	1.37648e-46
	79132.1	1.18626e-45
	79283.1	1.07535e-43
	56068.7	1.48573e-43
	57595.4	3.21871e-43
	59043.7	3.69756e-44
	60428.4	1.27998e-43
	61760.6	2.15134e-43
	63048.3	3.29586e-44
	64296.4	3.84264e-44
	65507.9	1.89127e-43
	66684.3	2.04192e-43
	67826.1	8.18817e-44
	68932.8	1.01034e-45
	70003.2	4.83224e-44
	71035.2	1.68413e-43
	72025.6	2.6982e-43
	72969.9	3.07143e-43
	73862.7	2.86344e-43
	74697	2.34657e-43
	75464.6	1.76421e-43
	76155.8	1.25042e-43
	76757.9	8.47139e-44
	77096.4	5.40017e-50
	55383.1	3.2329e-50
	58216	2.24642e-50
	60835.9	1.81023e-50
	62084	1.88226e-50
	65613.7	2.091e-50
	66720.4	2.11389e-50
	70757.6	1.3665e-50
	71650.3	2.28259e-50
	72484.6	2.70701e-50
	73252.3	2.6454e-50
	73943.4	2.28089e-50
	74545.5	1.79338e-50
	64752.6	1.28748e-16
	66279.5	2.83181e-16
	67727.9	3.67018e-16
	69112.7	3.64107e-16
	70445	3.03348e-16
	71732.8	2.21315e-16
	72981	1.44358e-16
	74192.6	8.51061e-17
	75369	4.5622e-17
	76510.9	2.23207e-17
	77617.7	1.00001e-17
	78688.3	4.11944e-18
	79720.4	1.5696e-18
	80710.9	5.58079e-19
	81655.4	1.87547e-19
	82548.3	6.06952e-20
	83382.8	1.94421e-20
	84150.7	6.40863e-21
	84842.1	2.28235e-21
	85444.5	9.16953e-22
	85499.2	6.28378e-31
	85634.8	5.43483e-30
	85785.6	4.56302e-28
	62564.5	4.20276e-23
	64091.5	3.47332e-23
	65539.8	8.60313e-24
	66924.6	2.52599e-25
	68256.9	1.1323e-23
	69544.7	2.73758e-23
	70792.9	3.68967e-23
	72004.5	3.68818e-23
	73181	3.01969e-23
	74322.8	2.12366e-23
	75429.7	1.31954e-23
	76500.2	7.38909e-24
	77532.3	3.79412e-24
	78522.8	1.81657e-24
	79467.3	8.2556e-25
	80360.3	3.62898e-25
	81194.8	1.57442e-25
	81962.6	6.87945e-26
	82654	3.08425e-26
	83256.4	1.43424e-26
	83311.1	9.91479e-36
	83446.7	8.75054e-35
	83597.6	7.45207e-33
	60404.1	7.71205e-30
	61931	5.18299e-31
	63379.4	1.5762e-30
	64764.1	4.1106e-30
	66096.5	2.78835e-30
	67384.3	4.39395e-31
	68632.4	2.54282e-31
	69844	2.21623e-30
	71020.5	4.50579e-30
	72162.4	5.67574e-30
	73269.2	5.45148e-30
	74339.8	4.35081e-30
	75371.9	3.02828e-30
	76362.4	1.90081e-30
	77306.9	1.1053e-30
	78199.8	6.09533e-31
	79034.3	3.25523e-31
	79802.2	1.71494e-31
	80493.6	9.042e-32
	81095.9	4.80092e-32
	81150.6	3.35653e-41
	81286.2	3.04715e-40
	81437.1	2.67381e-38
	58241.5	8.23647e-37
	59768.4	2.20438e-37
	61216.8	6.51018e-37
	62601.6	9.88505e-38
	63933.9	1.11703e-37
	65221.7	5.03473e-37
	66469.9	4.91669e-37
	67681.4	1.60953e-37
	68857.9	6.84334e-40
	69999.8	1.87535e-37
	71106.6	5.31085e-37
	72177.2	7.80769e-37
	73209.3	8.32765e-37
	74199.8	7.26954e-37
	75144.3	5.53553e-37
	76037.2	3.83356e-37
	76871.7	2.48938e-37
	77639.6	1.55151e-37
	78331	9.43619e-38
	78933.4	5.63739e-38
	78988.1	3.98224e-47
	79123.7	3.70945e-46
	79274.5	3.34726e-44
	56055	4.69242e-44
	57581.9	1.01887e-43
	59030.3	1.16101e-44
	60415.1	4.06282e-44
	61747.4	6.79925e-44
	63035.2	1.03252e-44
	64283.4	1.22714e-44
	65495	5.99467e-44
	66671.5	6.45184e-44
	67813.3	2.57471e-44
	68920.1	2.96871e-46
	69990.7	1.54443e-44
	71022.8	5.3505e-44
	72013.3	8.55342e-44
	72957.8	9.72324e-44
	73850.7	9.05565e-44
	74685.2	7.41489e-44
	75453.1	5.5695e-44
	76144.5	3.94176e-44
	76746.9	2.65969e-44
	77088.1	1.68563e-50
	55369.8	1.02325e-50
	64759	6.43233e-16
	66285.8	1.41514e-15
	67734	1.83459e-15
	69118.7	1.8204e-15
	70450.9	1.51711e-15
	71738.6	1.10715e-15
	72986.7	7.22407e-16
	74198.2	4.26051e-16
	75374.6	2.2847e-16
	76516.4	1.11834e-16
	77623.1	5.01296e-17
	78693.6	2.0662e-17
	79725.6	7.87805e-18
	80715.9	2.80314e-18
	81660.3	9.42773e-19
	82553	3.05397e-19
	83387.3	9.79197e-20
	84155	3.23085e-20
	84846.1	1.15206e-20
	85448.2	4.64377e-21
	85500.2	3.44962e-30
	85635.8	2.75945e-29
	85786.8	2.32481e-27
	62570.9	2.10054e-22
	64097.7	1.73716e-22
	65546	4.31073e-23
	66930.6	1.24224e-24
	68262.9	5.64839e-23
	69550.6	1.36729e-22
	70798.7	1.84404e-22
	72010.1	1.84423e-22
	73186.5	1.51065e-22
	74328.3	1.0629e-22
	75435	6.60694e-23
	76505.5	3.70181e-23
	77537.5	1.90172e-23
	78527.8	9.11022e-24
	79472.2	4.14244e-24
	80364.9	1.82196e-24
	81199.2	7.90894e-25
	81966.9	3.45833e-25
	82658	1.55215e-25
	83260.1	7.24335e-26
	83312.2	5.42568e-35
	83447.8	4.42981e-34
	83598.7	3.7869e-32
	60410.5	3.85611e-29
	61937.2	2.60119e-30
	63385.5	7.86389e-30
	64770.1	2.05455e-29
	66102.4	1.3958e-29
	67390.1	2.2097e-30
	68638.2	1.26013e-30
	69849.7	1.10521e-29
	71026.1	2.25016e-29
	72167.9	2.83664e-29
	73274.6	2.72624e-29
	74345	2.17708e-29
	75377	1.51609e-29
	76367.4	9.52085e-30
	77311.7	5.53909e-30
	78204.5	3.056e-30
	79038.8	1.6329e-30
	79806.4	8.60799e-31
	80497.6	4.54342e-31
	81099.7	2.42118e-31
	81151.7	1.83313e-40
	81287.3	1.5396e-39
	81438.2	1.35664e-37
	58247.9	4.11993e-36
	59774.7	1.09969e-36
	61222.9	3.25556e-36
	62607.6	4.96418e-37
	63939.8	5.55956e-37
	65227.5	2.51497e-36
	66475.6	2.46039e-36
	67687.1	8.08006e-37
	68863.5	3.15121e-39
	70005.3	9.33326e-37
	71112	2.64994e-36
	72182.5	3.90026e-36
	73214.5	4.16324e-36
	74204.8	3.63651e-36
	75149.1	2.77067e-36
	76041.9	1.91975e-36
	76876.2	1.24727e-36
	77643.9	7.77869e-37
	78335	4.7363e-37
	78937.1	2.84028e-37
	78989.1	2.17162e-46
	79124.7	1.87146e-45
	79275.6	1.69638e-43
	56061.4	2.3483e-43
	57588.2	5.09208e-43
	59036.5	5.83096e-44
	60421.1	2.02707e-43
	61753.4	3.40153e-43
	63041	5.19413e-44
	64289.1	6.09858e-44
	65500.6	2.99339e-43
	66677	3.2284e-43
	67818.8	1.29241e-43
	68925.5	1.55937e-45
	69996	7.66913e-44
	71028	2.66744e-43
	72018.3	4.27066e-43
	72962.7	4.85938e-43
	73855.4	4.52891e-43
	74689.7	3.71055e-43
	75457.4	2.78921e-43
	76148.5	1.97648e-43
	76750.6	1.33888e-43
	77089.2	8.53427e-50
	55376	5.11825e-50
	56824.3	1.40063e-50
	58208.9	3.5556e-50
	60828.9	2.86941e-50
	62077	2.97883e-50
	65606.6	3.31354e-50
	66713.4	3.34608e-50
	67783.8	1.35693e-50
	70750.5	2.16791e-50
	71643.3	3.6182e-50
	72477.6	4.28924e-50
	73245.2	4.19036e-50
	73936.4	3.61214e-50
	74538.4	2.83965e-50
	64768.6	5.13988e-16
	66295.1	1.1312e-15
	67743.2	1.46705e-15
	69127.7	1.4563e-15
	70459.8	1.21414e-15
	71747.4	8.8642e-16
	72995.3	5.78666e-16
	74206.7	3.41462e-16
	75383	1.83222e-16
	76524.6	8.97441e-17
	77631.2	4.02586e-17
	78701.5	1.6608e-17
	79733.3	6.33847e-18
	80723.4	2.25772e-18
	81667.5	7.60319e-19
	82560	2.46621e-19
	83394	7.91914e-20
	84161.4	2.61693e-20
	84852.1	9.34825e-21
	85453.8	3.78717e-21
	85501.8	3.20875e-30
	85637.4	2.26089e-29
	85788.4	1.91375e-27
	62580.5	1.67946e-22
	64107.1	1.39038e-22
	65555.2	3.4595e-23
	66939.6	9.69196e-25
	68271.8	4.5029e-23
	69559.3	1.09208e-22
	70807.3	1.47429e-22
	72018.6	1.47554e-22
	73194.9	1.20948e-22
	74336.5	8.51579e-23
	75443.1	5.29713e-23
	76513.4	2.96996e-23
	77545.2	1.52699e-23
	78535.4	7.32086e-24
	79479.5	3.3315e-24
	80372	1.46655e-24
	81206	6.37172e-25
	81973.3	2.78905e-25
	82664.1	1.25384e-25
	83265.7	5.88269e-26
	83313.7	5.02298e-35
	83449.3	3.61317e-34
	83600.3	3.10509e-32
	60420	3.08483e-29
	61946.6	2.09268e-30
	63394.7	6.27018e-30
	64779.2	1.64284e-29
	66111.3	1.11862e-29
	67398.8	1.78311e-30
	68646.8	9.94717e-31
	69858.2	8.80632e-30
	71034.4	1.79678e-29
	72176.1	2.26784e-29
	73282.7	2.18166e-29
	74352.9	1.74364e-29
	75384.7	1.21516e-29
	76374.9	7.63718e-30
	77319	4.44622e-30
	78211.5	2.45483e-30
	79045.5	1.3127e-30
	79812.8	6.92605e-31
	80503.6	3.66192e-31
	81105.3	1.96213e-31
	81153.3	1.69203e-40
	81288.9	1.25206e-39
	81439.9	1.10971e-37
	58257.4	3.29794e-36
	59784	8.76697e-37
	61232.1	2.60518e-36
	62616.6	3.99751e-37
	63948.7	4.41717e-37
	65236.3	2.00914e-36
	66484.2	1.97063e-36
	67695.6	6.50287e-37
	68871.9	2.21312e-39
	70013.5	7.41382e-37
	71120.1	2.11331e-36
	72190.4	3.11593e-36
	73222.2	3.3299e-36
	74212.3	2.9113e-36
	75156.4	2.22002e-36
	76048.9	1.53935e-36
	76882.9	1.00094e-36
	77650.3	6.24795e-37
	78341	3.81095e-37
	78942.7	2.29833e-37
	78990.7	1.99991e-46
	79126.3	1.5186e-45
	79277.3	1.38526e-43
	56071	1.88117e-43
	57597.6	4.07073e-43
	59045.7	4.69607e-44
	60430.1	1.61654e-43
	61762.2	2.72346e-43
	63049.8	4.19327e-44
	64297.8	4.83457e-44
	65509.1	2.39e-43
	66685.4	2.58558e-43
	67827	1.04004e-43
	68933.6	1.34021e-45
	70003.9	6.07207e-44
	71035.7	2.12458e-43
	72025.8	3.40931e-43
	72970	3.88465e-43
	73862.4	3.6242e-43
	74696.5	2.97225e-43
	75463.8	2.2366e-43
	76154.6	1.58794e-43
	76756.2	1.08204e-43
	77090.8	6.95875e-50
	55385.4	4.09697e-50
	56833.5	1.11565e-50
	58218	2.84794e-50
	60837.6	2.28998e-50
	62085.6	2.38768e-50
	65614.9	2.64562e-50
	66721.4	2.6808e-50
	67791.7	1.09278e-50
	70757.8	1.72453e-50
	71650.3	2.8861e-50
	72484.3	3.42727e-50
	73251.6	3.35349e-50
	73942.4	2.89721e-50
	74544	2.2919e-50
	64747.4	2.36881e-16
	66274.2	5.20996e-16
	67722.5	6.75222e-16
	69107.1	6.69829e-16
	70439.4	5.5806e-16
	71727	4.07142e-16
	72975.1	2.65581e-16
	74186.6	1.56596e-16
	75363	8.39499e-17
	76504.8	4.1079e-17
	77611.5	1.84067e-17
	78682	7.58407e-18
	79714	2.89029e-18
	80704.3	1.02781e-18
	81648.7	3.45463e-19
	82541.4	1.11812e-19
	83375.7	3.58159e-20
	84143.4	1.18044e-20
	84834.5	4.20446e-21
	85436.6	1.69326e-21
	85488.6	1.25778e-30
	85624.2	1.00599e-29
	85775.2	8.47422e-28
	62559.4	7.73825e-23
	64086.2	6.39418e-23
	65534.5	1.58362e-23
	66919.1	4.65396e-25
	68251.4	2.08464e-23
	69539.1	5.03984e-23
	70787.2	6.79269e-23
	71998.7	6.79008e-23
	73175.1	5.55983e-23
	74316.8	3.91059e-23
	75423.6	2.42999e-23
	76494	1.36096e-23
	77526	6.9893e-24
	78516.4	3.34703e-24
	79460.7	1.52125e-24
	80353.5	6.68808e-25
	81187.8	2.90192e-25
	81955.4	1.26832e-25
	82646.6	5.69002e-26
	83248.7	2.65423e-26
	83300.7	1.98806e-35
	83436.3	1.62307e-34
	83587.2	1.38733e-32
	60399.1	1.42129e-29
	61925.9	9.54718e-31
	63374.2	2.9053e-30
	64758.8	7.57544e-30
	66091.1	5.13899e-30
	67378.7	8.09955e-31
	68626.9	4.68311e-31
	69838.3	4.0832e-30
	71014.7	8.30242e-30
	72156.5	1.04592e-29
	73263.2	1.00471e-29
	74333.7	8.0198e-30
	75365.7	5.58287e-30
	76356	3.50475e-30
	77300.4	2.03831e-30
	78193.1	1.12421e-30
	79027.4	6.00505e-31
	79795.1	3.16467e-31
	80486.2	1.66996e-31
	81088.3	8.89661e-32
	81140.3	6.73562e-41
	81275.9	5.65661e-40
	81426.9	4.98412e-38
	58236.7	1.51996e-36
	59763.5	4.06899e-37
	61211.8	1.20138e-36
	62596.4	1.82438e-37
	63928.7	2.06116e-37
	65216.4	9.29103e-37
	66464.5	9.07519e-37
	67676	2.97209e-37
	68852.4	1.24699e-39
	69994.1	3.45826e-37
	71100.9	9.79792e-37
	72171.3	1.44079e-36
	73203.3	1.53701e-36
	74193.7	1.3419e-36
	75138	1.02206e-36
	76030.8	7.07908e-37
	76865.1	4.59808e-37
	77632.7	2.86676e-37
	78323.9	1.74519e-37
	78926	1.04634e-37
	78978	7.99997e-47
	79113.6	6.89391e-46
	79264.5	6.24842e-44
	56050.5	8.67465e-44
	57577.3	1.88366e-43
	59025.6	2.14662e-44
	60410.2	7.51078e-44
	61742.5	1.25716e-43
	63030.1	1.91044e-44
	64278.3	2.26689e-44
	65489.7	1.1081e-43
	66666.1	1.19303e-43
	67807.9	4.76458e-44
	68914.6	5.55516e-46
	69985.1	2.85051e-44
	71017.1	9.8853e-44
	72007.4	1.58093e-43
	72951.8	1.79775e-43
	73844.5	1.67471e-43
	74678.8	1.37162e-43
	75446.5	1.03068e-43
	76137.6	7.30219e-44
	76739.7	4.94557e-44
	77078.3	3.15204e-50
	55365.4	1.89541e-50
	58198.3	1.31633e-50
	60818.2	1.06452e-50
	62066.3	1.1025e-50
	65596	1.22885e-50
	66702.7	1.23886e-50
	71632.6	1.34238e-50
	72466.9	1.59039e-50
	73234.6	1.55303e-50
	73925.7	1.33827e-50
	74527.8	1.0518e-50
	64757	8.2815e-16
	66283.6	1.82202e-15
	67731.7	2.36226e-15
	69116.1	2.34424e-15
	70448.2	1.95393e-15
	71735.8	1.42615e-15
	72983.8	9.30731e-16
	74195.1	5.49056e-16
	75371.4	2.94534e-16
	76513	1.4422e-16
	77619.6	6.46725e-17
	78689.9	2.66688e-17
	79721.7	1.01738e-17
	80711.8	3.62195e-18
	81655.9	1.2189e-18
	82548.4	3.95051e-19
	83382.5	1.26726e-19
	84149.8	4.18302e-20
	84840.6	1.49265e-20
	85442.2	6.04163e-21
	85490.2	5.11874e-30
	85625.8	3.60598e-29
	85776.8	3.05188e-27
	62569	2.70679e-22
	64095.6	2.23903e-22
	65543.7	5.56031e-23
	66928.2	1.58885e-24
	68260.3	7.27086e-23
	69547.8	1.76106e-22
	70795.8	2.3759e-22
	72007.2	2.37682e-22
	73183.4	1.94748e-22
	74325.1	1.3707e-22
	75431.6	8.52336e-23
	76501.9	4.7773e-23
	77533.7	2.45526e-23
	78523.9	1.1767e-23
	79468	5.35254e-24
	80360.5	2.35526e-24
	81194.5	1.02284e-24
	81961.8	4.47492e-25
	82652.6	2.01093e-25
	83254.3	9.43081e-26
	83302.3	8.05258e-35
	83437.9	5.79189e-34
	83588.9	4.97675e-32
	60408.7	4.97447e-29
	61935.3	3.36028e-30
	63383.4	1.0135e-29
	64767.8	2.65009e-29
	66100	1.80175e-29
	67387.5	2.85949e-30
	68635.5	1.61736e-30
	69846.8	1.42348e-29
	71023.1	2.90054e-29
	72164.7	3.6584e-29
	73271.3	3.51758e-29
	74341.6	2.81017e-29
	75373.4	1.95773e-29
	76363.5	1.22993e-29
	77307.7	7.15839e-30
	78200.2	3.95098e-30
	79034.2	2.11206e-30
	79801.5	1.11404e-30
	80492.3	5.88856e-31
	81093.9	3.15428e-31
	81141.9	2.72004e-40
	81277.5	2.01264e-39
	81428.5	1.78365e-37
	58246.3	5.32315e-36
	59772.9	1.41929e-36
	61221	4.20615e-36
	62605.5	6.42737e-37
	63937.6	7.16488e-37
	65225.1	3.24738e-36
	66473.1	3.18009e-36
	67684.5	1.04651e-36
	68860.7	3.84902e-39
	70002.4	1.20189e-36
	71108.9	3.41854e-36
	72179.2	5.03567e-36
	73211	5.37835e-36
	74201.2	4.70024e-36
	75145.3	3.58279e-36
	76037.8	2.48352e-36
	76871.8	1.61433e-36
	77639.1	1.00742e-36
	78329.9	6.14346e-37
	78931.6	3.70427e-37
	78979.6	3.22326e-46
	79115.2	2.44738e-45
	79266.2	2.23233e-43
	56060.1	3.04028e-43
	57586.7	6.58834e-43
	59034.8	7.5638e-44
	60419.2	2.62041e-43
	61751.4	4.4036e-43
	63038.9	6.74772e-44
	64286.9	7.8619e-44
	65498.2	3.87064e-43
	66674.5	4.18033e-43
	67816.1	1.67747e-43
	68922.7	2.09157e-45
	69993	9.87434e-44
	71024.8	3.44476e-43
	72014.9	5.52159e-43
	72959.1	6.28742e-43
	73851.6	5.86334e-43
	74685.6	4.80677e-43
	75452.9	3.61611e-43
	76143.7	2.56673e-43
	76745.3	1.7486e-43
	77079.9	1.12443e-49
	55374.8	6.63755e-50
	56822.9	1.81305e-50
	58207.3	4.61269e-50
	60827	3.71677e-50
	62075	3.86615e-50
	64462.6	1.18461e-50
	65604.2	4.29236e-50
	66710.8	4.34225e-50
	67781.1	1.76583e-50
	70747.2	2.80272e-50
	71639.6	4.68489e-50
	72473.7	5.5595e-50
	73241	5.43741e-50
	73931.8	4.6961e-50
	74533.4	3.71416e-50
	64769.7	5.90651e-16
	66296	1.30009e-15
	67743.9	1.68638e-15
	69128.2	1.67441e-15
	70460.1	1.39634e-15
	71747.5	1.01977e-15
	72995.3	6.65936e-16
	74206.5	3.93132e-16
	75382.6	2.11054e-16
	76524	1.03437e-16
	77630.4	4.64333e-17
	78700.4	1.91698e-17
	79732	7.32237e-18
	80721.9	2.6107e-18
	81665.7	8.80019e-19
	82557.8	2.85735e-19
	83391.4	9.18406e-20
	84158.3	3.03758e-20
	84848.6	1.08652e-20
	85449.7	4.42764e-21
	85492.4	4.57675e-30
	85627.9	2.66299e-29
	85779	2.26598e-27
	62581.8	1.93191e-22
	64108.1	1.60031e-22
	65555.9	3.98844e-23
	66940.2	1.09737e-24
	68272.1	5.16896e-23
	69559.5	1.25518e-22
	70807.3	1.69562e-22
	72018.5	1.69797e-22
	73194.6	1.39253e-22
	74336	9.81011e-23
	75442.4	6.10596e-23
	76512.5	3.42559e-23
	77544	1.76237e-23
	78533.9	8.45536e-24
	79477.7	3.85033e-24
	80369.8	1.69617e-24
	81203.5	7.37466e-25
	81970.3	3.23085e-25
	82660.6	1.45506e-25
	83261.7	6.87304e-26
	83304.4	7.15404e-35
	83440	4.25154e-34
	83591.1	3.67542e-32
	60421.4	3.55317e-29
	61947.8	2.41829e-30
	63395.6	7.20752e-30
	64779.9	1.89167e-29
	66111.8	1.28997e-29
	67399.2	2.06611e-30
	68647	1.13472e-30
	69858.2	1.01139e-29
	71034.3	2.0667e-29
	72175.7	2.61092e-29
	73282.1	2.51354e-29
	74352.1	2.01028e-29
	75383.7	1.4019e-29
	76373.6	8.81621e-30
	77317.4	5.13616e-30
	78209.5	2.83761e-30
	79043.1	1.51838e-30
	79810	8.01917e-31
	80500.3	4.24774e-31
	81101.4	2.29225e-31
	81144.1	2.40684e-40
	81279.6	1.47159e-39
	81430.8	1.3131e-37
	58259.1	3.80532e-36
	59785.4	1.00908e-36
	61233.2	3.00548e-36
	62617.5	4.63127e-37
	63949.4	5.07098e-37
	65236.8	2.3152e-36
	66484.6	2.27524e-36
	67695.8	7.53479e-37
	68871.9	2.29462e-39
	70013.3	8.50426e-37
	71119.7	2.43156e-36
	72189.8	3.59027e-36
	73221.3	3.84057e-36
	74211.2	3.36066e-36
	75155	2.56443e-36
	76047.1	1.77946e-36
	76880.8	1.15781e-36
	77647.6	7.23476e-37
	78337.9	4.4218e-37
	78939	2.68658e-37
	78981.7	2.84345e-46
	79117.3	1.78412e-45
	79268.4	1.6396e-43
	56072.8	2.17547e-43
	57599.2	4.70177e-43
	59047	5.45077e-44
	60431.3	1.86378e-43
	61763.2	3.14877e-43
	63050.6	4.87861e-44
	64298.4	5.5474e-44
	65509.6	2.75745e-43
	66685.7	2.99037e-43
	67827.1	1.20759e-43
	68933.5	1.64025e-45
	70003.5	6.95606e-44
	71035.1	2.44613e-43
	72025	3.93267e-43
	72968.8	4.48658e-43
	73860.9	4.18982e-43
	74694.5	3.43917e-43
	75461.4	2.59097e-43
	76151.7	1.8436e-43
	76752.8	1.26607e-43
	77082.2	8.24249e-50
	55387.3	4.74466e-50
	56835.1	1.28754e-50
	58219.4	3.30013e-50
	60838.7	2.64635e-50
	62086.5	2.76873e-50
	65615.2	3.05799e-50
	66721.6	3.10765e-50
	67791.6	1.27249e-50
	70756.9	1.98684e-50
	71649	3.33348e-50
	72482.6	3.96468e-50
	73249.5	3.88555e-50
	73939.8	3.36569e-50
	74540.9	2.68458e-50
	64741.5	3.17901e-16
	66268.1	6.99114e-16
	67716.2	9.0603e-16
	69100.7	8.98809e-16
	70432.8	7.48868e-16
	71720.3	5.46393e-16
	72968.3	3.56463e-16
	74179.7	2.10195e-16
	75355.9	1.12715e-16
	76497.6	5.51681e-17
	77604.2	2.47286e-17
	78674.4	1.01919e-17
	79706.2	3.88563e-18
	80696.4	1.38228e-18
	81640.5	4.64753e-19
	82533	1.50467e-19
	83367	4.82045e-20
	84134.3	1.58877e-20
	84825.1	5.66089e-21
	85426.8	2.2886e-21
	85474.8	1.93884e-30
	85610.4	1.36553e-29
	85761.4	1.15556e-27
	62553.7	1.03946e-22
	64080.3	8.58882e-23
	65528.4	2.12737e-23
	66912.9	6.24e-25
	68245	2.79908e-23
	69532.5	6.76799e-23
	70780.5	9.12279e-23
	71991.9	9.12051e-23
	73168.1	7.46928e-23
	74309.8	5.25462e-23
	75416.3	3.26595e-23
	76486.6	1.82969e-23
	77518.4	9.399e-24
	78508.6	4.5024e-24
	79452.7	2.04697e-24
	80345.2	9.00199e-25
	81179.2	3.907e-25
	81946.5	1.70833e-25
	82637.3	7.67219e-26
	83238.9	3.59605e-26
	83287	3.07035e-35
	83422.5	2.20809e-34
	83573.6	1.89706e-32
	60393.6	1.91164e-29
	61920.1	1.28406e-30
	63368.2	3.90725e-30
	64752.7	1.01888e-29
	66084.8	6.91325e-30
	67372.4	1.09078e-30
	68620.4	6.28427e-31
	69831.7	5.48777e-30
	71008	1.11627e-29
	72149.6	1.4066e-29
	73256.2	1.35153e-29
	74326.5	1.07912e-29
	75358.3	7.51427e-30
	76348.4	4.71873e-30
	77292.5	2.74498e-30
	78185	1.5144e-30
	79019	8.09208e-31
	79786.4	4.2667e-31
	80477.2	2.25435e-31
	81078.8	1.20719e-31
	81126.8	1.04096e-40
	81262.4	7.70173e-40
	81413.4	6.82494e-38
	58231.5	2.04809e-36
	59758	5.48237e-37
	61206.1	1.61903e-36
	62590.6	2.46026e-37
	63922.7	2.77498e-37
	65210.3	1.2518e-36
	66458.2	1.22328e-36
	67669.6	4.0107e-37
	68845.9	1.62941e-39
	69987.5	4.65159e-37
	71094.1	1.31922e-36
	72164.4	1.94093e-36
	73196.2	2.07132e-36
	74186.3	1.80905e-36
	75130.4	1.37832e-36
	76022.9	9.55025e-37
	76856.9	6.20518e-37
	77624.3	3.87109e-37
	78315	2.35987e-37
	78916.7	1.42252e-37
	78964.7	1.23778e-46
	79100.3	9.39752e-46
	79251.3	8.57102e-44
	56045.6	1.17179e-43
	57572.1	2.54421e-43
	59020.2	2.90224e-44
	60404.7	1.01403e-43
	61736.8	1.69846e-43
	63024.4	2.58571e-44
	64272.4	3.0554e-44
	65483.7	1.49606e-43
	66660	1.61208e-43
	67801.6	6.44788e-44
	68908.2	7.68699e-46
	69978.5	3.83732e-44
	71010.3	1.33333e-43
	72000.4	2.13419e-43
	72944.5	2.42815e-43
	73837	2.26305e-43
	74671	1.85432e-43
	75438.4	1.39451e-43
	76129.2	9.89453e-44
	76730.8	6.73917e-44
	77065.4	4.33282e-50
	55360.6	2.56695e-50
	58193.2	1.78307e-50
	60812.8	1.4408e-50
	62060.8	1.494e-50
	65590.1	1.66312e-50
	66696.7	1.6787e-50
	70733	1.0883e-50
	71625.5	1.81631e-50
	72459.5	2.1534e-50
	73226.8	2.10487e-50
	73917.6	1.81713e-50
	74519.3	1.43668e-50
	64754.3	9.52264e-16
	66280.6	2.09513e-15
	67728.5	2.71657e-15
	69112.7	2.69625e-15
	70444.6	2.24769e-15
	71732	1.64092e-15
	72979.8	1.0712e-15
	74191	6.32119e-16
	75367.1	3.39229e-16
	76508.6	1.66187e-16
	77614.9	7.45658e-17
	78685	3.07689e-17
	79716.5	1.17457e-17
	80706.4	4.18468e-18
	81650.2	1.40934e-18
	82542.3	4.57104e-19
	83376	1.46727e-19
	84142.9	4.84583e-20
	84833.2	1.73076e-20
	85434.2	7.04466e-21
	85476.9	7.28136e-30
	85612.5	4.23576e-29
	85763.6	3.60354e-27
	62566.5	3.11594e-22
	64092.8	2.57831e-22
	65540.6	6.40923e-23
	66924.9	1.81085e-24
	68256.8	8.35786e-23
	69544.2	2.02599e-22
	70792	2.73449e-22
	72003.2	2.73662e-22
	73179.3	2.24317e-22
	74320.7	1.57951e-22
	75427.1	9.82642e-23
	76497.2	5.51026e-23
	77528.7	2.83358e-23
	78518.6	1.3588e-23
	79462.4	6.18451e-24
	80354.5	2.72279e-24
	81188.1	1.18313e-24
	81955	5.18024e-25
	82645.3	2.3316e-25
	83246.4	1.10075e-25
	83289.1	1.14569e-34
	83424.7	6.8078e-34
	83575.8	5.88446e-32
	60406.3	5.73474e-29
	61932.6	3.88121e-30
	63380.5	1.16702e-29
	64764.8	3.0547e-29
	66096.7	2.07882e-29
	67384	3.31034e-30
	68631.9	1.85194e-30
	69843	1.63761e-29
	71019.1	3.34053e-29
	72160.6	4.2162e-29
	73267	4.05626e-29
	74337	3.24223e-29
	75368.6	2.25997e-29
	76358.4	1.42057e-29
	77302.2	8.2721e-30
	78194.4	4.56822e-30
	79028	2.44344e-30
	79794.9	1.2899e-30
	80485.2	6.83017e-31
	81086.3	3.68451e-31
	81128.9	3.86866e-40
	81264.5	2.3652e-39
	81415.6	2.11026e-37
	58244.2	6.14946e-36
	59770.5	1.63714e-36
	61218.4	4.85896e-36
	62602.7	7.4459e-37
	63934.6	8.2489e-37
	65221.9	3.74831e-36
	66469.7	3.67565e-36
	67680.9	1.21288e-36
	68857	4.11548e-39
	69998.5	1.38242e-36
	71104.9	3.94117e-36
	72174.9	5.81192e-36
	73206.5	6.21231e-36
	74196.3	5.43266e-36
	75140.1	4.14349e-36
	76032.3	2.87391e-36
	76865.9	1.86922e-36
	77632.8	1.16761e-36
	78323.1	7.13393e-37
	78924.2	4.33314e-37
	78966.8	4.58616e-46
	79102.4	2.87737e-45
	79253.5	2.64413e-43
	56058.3	3.52173e-43
	57584.6	7.62549e-43
	59032.5	8.7844e-44
	60416.8	3.02916e-43
	61748.7	5.10089e-43
	63036	7.85218e-44
	64283.8	9.05515e-44
	65495	4.47628e-43
	66671.1	4.84366e-43
	67812.6	1.94968e-43
	68919	2.53756e-45
	69989	1.13541e-43
	71020.6	3.9769e-43
	72010.4	6.38442e-43
	72954.2	7.27729e-43
	73846.4	6.79184e-43
	74680	5.57242e-43
	75446.9	4.19658e-43
	76137.2	2.98514e-43
	76738.3	2.04937e-43
	77067.6	1.33398e-49
	53846.8	1.1061e-50
	55373.1	7.70646e-50
	56821	2.09974e-50
	58205.2	5.35777e-50
	60824.5	4.30855e-50
	62072.3	4.49346e-50
	64459.6	1.36727e-50
	65601	4.97618e-50
	66707.4	5.04592e-50
	67777.5	2.05953e-50
	70742.7	3.24045e-50
	71634.8	5.42788e-50
	72468.5	6.44992e-50
	73235.4	6.31749e-50
	73925.6	5.46997e-50
	74526.7	4.36136e-50
	64770.2	6.33623e-16
	66296.2	1.39492e-15
	67743.8	1.80976e-15
	69127.8	1.79738e-15
	70459.4	1.49934e-15
	71746.6	1.0954e-15
	72994.2	7.15634e-16
	74205.2	4.22675e-16
	75381	2.27061e-16
	76522.3	1.1136e-16
	77628.4	5.00299e-17
	78698.2	2.06741e-17
	79729.4	7.90521e-18
	80718.9	2.8217e-18
	81662.3	9.52223e-19
	82554	3.09549e-19
	83387.2	9.96037e-20
	84153.5	3.2977e-20
	84843.2	1.18139e-20
	85443.6	4.8498e-21
	85479.6	6.74397e-30
	85615.1	2.9519e-29
	85766.4	2.52387e-27
	62582.4	2.07523e-22
	64108.4	1.72023e-22
	65556	4.29532e-23
	66939.9	1.15719e-24
	68271.6	5.53966e-23
	69558.8	1.34699e-22
	70806.4	1.82106e-22
	72017.3	1.82474e-22
	73193.2	1.49743e-22
	74334.4	1.05561e-22
	75440.6	6.57475e-23
	76510.3	3.69146e-23
	77541.6	1.90067e-23
	78531.1	9.12633e-24
	79474.5	4.15939e-24
	80366.2	1.83386e-24
	81199.4	7.98028e-25
	81965.7	3.49991e-25
	82655.4	1.57961e-25
	83255.8	7.5252e-26
	83291.7	1.05266e-34
	83427.3	4.70852e-34
	83578.5	4.09403e-32
	60422.3	3.82312e-29
	61948.3	2.61172e-30
	63395.8	7.73732e-30
	64779.8	2.03478e-29
	66111.5	1.38993e-29
	67398.6	2.23873e-30
	68646.2	1.20714e-30
	69857.2	1.08447e-29
	71033.1	2.22011e-29
	72174.3	2.80779e-29
	73280.4	2.7055e-29
	74350.2	2.16552e-29
	75381.5	1.51144e-29
	76371	9.51262e-30
	77314.4	5.54595e-30
	78206.1	3.06632e-30
	79039.2	1.64215e-30
	79805.6	8.68207e-31
	80495.2	4.60966e-31
	81095.7	2.50994e-31
	81131.6	3.5368e-40
	81267.2	1.62773e-39
	81418.4	1.46229e-37
	58260.2	4.10403e-36
	59786.2	1.08515e-36
	61233.7	3.24079e-36
	62617.7	5.01828e-37
	63949.4	5.43633e-37
	65236.5	2.49297e-36
	66484.1	2.45539e-36
	67695.1	8.16652e-37
	68871	2.16228e-39
	70012.2	9.10754e-37
	71118.3	2.61371e-36
	72188.1	3.8656e-36
	73219.3	4.14001e-36
	74208.9	3.62617e-36
	75152.3	2.76957e-36
	76044	1.92332e-36
	76877.1	1.25252e-36
	77643.5	7.8361e-37
	78333.1	4.80138e-37
	78933.6	2.94443e-37
	78969.5	4.17681e-46
	79105.1	1.97276e-45
	79256.3	1.82695e-43
	56074.3	2.35306e-43
	57600.3	5.07769e-43
	59047.8	5.92144e-44
	60431.8	2.00878e-43
	61763.5	3.40507e-43
	63050.6	5.31448e-44
	64298.2	5.94469e-44
	65509.2	2.97413e-43
	66685.1	3.23509e-43
	67826.3	1.31244e-43
	68932.4	1.89485e-45
	70002.2	7.43864e-44
	71033.4	2.63187e-43
	72023	4.24096e-43
	72966.4	4.8454e-43
	73858.1	4.53009e-43
	74691.2	3.72274e-43
	75457.6	2.80852e-43
	76147.2	2.00394e-43
	76747.7	1.38961e-43
	77070.4	9.19385e-50
	55388.7	5.14254e-50
	56836.3	1.3897e-50
	58220.3	3.57912e-50
	60839.1	2.86077e-50
	62086.7	3.00531e-50
	65614.8	3.30644e-50
	66720.9	3.37187e-50
	67790.7	1.3882e-50
	70754.8	2.13987e-50
	71646.5	3.60098e-50
	72479.7	4.29112e-50
	73246	4.2137e-50
	73935.7	3.66184e-50
	74536.1	2.95084e-50
	64735	3.68782e-16
	66261.3	8.10936e-16
	67709.2	1.05096e-15
	69093.4	1.04262e-15
	70425.3	8.68757e-16
	71712.7	6.33945e-16
	72960.5	4.13661e-16
	74171.7	2.43998e-16
	75347.8	1.30874e-16
	76489.2	6.40801e-17
	77595.6	2.87361e-17
	78665.7	1.18493e-17
	79697.2	4.51993e-18
	80687.1	1.60887e-18
	81630.9	5.4124e-19
	82523	1.75314e-19
	83356.7	5.6179e-20
	84123.6	1.85192e-20
	84813.8	6.60224e-21
	85414.9	2.68333e-21
	85457.6	2.7732e-30
	85593.2	1.61284e-29
	85744.3	1.37178e-27
	62547.3	1.20732e-22
	64073.6	9.97614e-23
	65521.5	2.47186e-23
	66905.8	7.21676e-25
	68237.7	3.24853e-23
	69525	7.85711e-23
	70772.9	1.05936e-22
	71984.1	1.05937e-22
	73160.1	8.67786e-23
	74301.6	6.1068e-23
	75408	3.79685e-23
	76478	2.128e-23
	77509.6	1.09363e-23
	78499.5	5.24092e-24
	79443.3	2.38383e-24
	80335.4	1.04878e-24
	81169	4.55388e-25
	81935.9	1.99237e-25
	82626.2	8.96075e-26
	83227.3	4.22753e-26
	83269.9	4.39977e-35
	83405.5	2.61408e-34
	83556.6	2.25906e-32
	60387.4	2.22397e-29
	61913.7	1.49457e-30
	63361.6	4.54383e-30
	64745.9	1.18529e-29
	66077.8	8.04618e-30
	67365.1	1.27199e-30
	68613	7.28197e-31
	69824.1	6.37597e-30
	71000.2	1.29783e-29
	72141.7	1.6361e-29
	73248.1	1.57268e-29
	74318.1	1.2562e-29
	75349.7	8.7511e-30
	76339.5	5.49752e-30
	77283.3	3.19945e-30
	78175.5	1.76589e-30
	79009.1	9.44057e-31
	79776	4.98137e-31
	80466.3	2.63632e-31
	81067.4	1.42157e-31
	81110	1.49255e-40
	81245.6	9.12397e-40
	81396.7	8.13948e-38
	58225.7	2.38848e-36
	59752	6.3903e-37
	61199.8	1.88825e-36
	62584.1	2.87336e-37
	63916	3.2304e-37
	65203.4	1.45923e-36
	66451.2	1.42719e-36
	67662.4	4.68773e-37
	68838.5	1.80808e-39
	69979.9	5.40875e-37
	71086.3	1.53649e-36
	72156.4	2.26224e-36
	73187.9	2.41567e-36
	74177.8	2.11093e-36
	75121.6	1.60902e-36
	76013.7	1.11541e-36
	76847.3	7.25127e-37
	77614.2	4.5274e-37
	78304.5	2.76512e-37
	78905.6	1.67899e-37
	78948.3	1.77695e-46
	79083.9	1.11477e-45
	79235	1.02432e-43
	56040.2	1.37079e-43
	57566.5	2.97512e-43
	59014.4	3.40002e-44
	60398.6	1.18503e-43
	61730.5	1.98726e-43
	63017.9	3.03442e-44
	64265.7	3.5613e-44
	65476.9	1.74847e-43
	66653	1.88674e-43
	67794.4	7.56307e-44
	68900.8	9.31832e-46
	69970.9	4.46536e-44
	71002.4	1.55633e-43
	71992.3	2.49384e-43
	72936.1	2.83966e-43
	73828.2	2.64823e-43
	74661.9	2.1715e-43
	75428.8	1.63448e-43
	76119	1.16221e-43
	76720.1	7.97611e-44
	77049.5	5.19094e-50
	55355.4	3.01227e-50
	58187.5	2.09314e-50
	60806.8	1.68913e-50
	62054.6	1.75469e-50
	65583.3	1.94966e-50
	66689.7	1.97148e-50
	70725	1.2731e-50
	71617.1	2.12825e-50
	72450.8	2.52618e-50
	73217.7	2.47251e-50
	73907.9	2.13969e-50
	74509	1.70522e-50
	64750.9	1.01222e-15
	66276.9	2.22715e-15
	67724.5	2.8881e-15
	69108.5	2.86703e-15
	70440.1	2.3905e-15
	71727.3	1.74569e-15
	72974.9	1.13996e-15
	74185.9	6.73e-16
	75361.7	3.61341e-16
	76503	1.77127e-16
	77609.1	7.95302e-17
	78678.9	3.28421e-17
	79710.1	1.25485e-17
	80699.6	4.47496e-18
	81643	1.50851e-18
	82534.7	4.89719e-19
	83367.9	1.57318e-19
	84134.2	5.19908e-20
	84823.9	1.85908e-20
	85424.3	7.62053e-21
	85460.2	1.05961e-29
	85595.8	4.63688e-29
	85747.1	3.96364e-27
	62563.3	3.31686e-22
	64089.3	2.74564e-22
	65536.8	6.83379e-23
	66920.8	1.90356e-24
	68252.5	8.88144e-23
	69539.6	2.15494e-22
	70787.2	2.91014e-22
	71998.2	2.91379e-22
	73174.1	2.38959e-22
	74315.3	1.68351e-22
	75421.4	1.04796e-22
	76491.2	5.88064e-23
	77522.5	3.02596e-23
	78512	1.45206e-23
	79455.4	6.61361e-24
	80347.1	2.91379e-24
	81180.2	1.26705e-24
	81946.6	5.55288e-25
	82636.2	2.50421e-25
	83236.7	1.19219e-25
	83272.6	1.66761e-34
	83408.2	7.45803e-34
	83559.4	6.48378e-32
	60403.4	6.11582e-29
	61929.4	4.14886e-30
	63376.9	1.24268e-29
	64760.9	3.25701e-29
	66092.6	2.21929e-29
	67379.7	3.54874e-30
	68627.3	1.95817e-30
	69838.3	1.74178e-29
	71014.2	3.55798e-29
	72155.4	4.49447e-29
	73261.5	4.32708e-29
	74331.3	3.46112e-29
	75362.6	2.41416e-29
	76352.1	1.51849e-29
	77295.5	8.84826e-30
	78187.2	4.88951e-30
	79020.3	2.61717e-30
	79786.7	1.38304e-30
	80476.3	7.33943e-31
	81076.8	3.99459e-31
	81112.7	5.62891e-40
	81248.3	2.59022e-39
	81399.5	2.32668e-37
	58241.6	6.57519e-36
	59767.6	1.74721e-36
	61215.2	5.19506e-36
	62599.1	7.98876e-37
	63930.8	8.78234e-37
	65218	4.00343e-36
	66465.5	3.93273e-36
	67676.5	1.30206e-36
	68852.4	3.9773e-39
	69993.6	1.46998e-36
	71099.8	4.20317e-36
	72169.5	6.20671e-36
	73200.8	6.64089e-36
	74190.3	5.81223e-36
	75133.7	4.43637e-36
	76025.4	3.07919e-36
	76858.6	2.00435e-36
	77624.9	1.2534e-36
	78314.6	7.67672e-37
	78915	4.70617e-37
	78950.9	6.67578e-46
	79086.5	3.1528e-45
	79237.7	2.91945e-43
	56056.1	3.77809e-43
	57582.1	8.17234e-43
	59029.7	9.45489e-44
	60413.7	3.24151e-43
	61745.3	5.47218e-43
	63032.5	8.4722e-44
	64280.1	9.64523e-44
	65491.1	4.79241e-43
	66666.9	5.19814e-43
	67808.2	2.10026e-43
	68914.3	2.88012e-45
	69984.1	1.20687e-43
	71015.3	4.2485e-43
	72004.8	6.83373e-43
	72948.2	7.79924e-43
	73839.9	7.28638e-43
	74673.1	5.98395e-43
	75439.4	4.51233e-43
	76129.1	3.21832e-43
	76729.5	2.23101e-43
	77052.3	1.47577e-49
	53845	1.19115e-50
	55371	8.29154e-50
	56818.6	2.25208e-50
	58202.6	5.76789e-50
	60821.4	4.62647e-50
	62069	4.84109e-50
	64455.8	1.46017e-50
	65597.1	5.34364e-50
	66703.2	5.43453e-50
	67773	2.22849e-50
	70737.1	3.46797e-50
	71628.8	5.82427e-50
	72462	6.93286e-50
	73228.3	6.80256e-50
	73918	5.90832e-50
	74518.4	4.75942e-50
	64770.1	6.42652e-16
	66295.7	1.41504e-15
	67742.9	1.83631e-15
	69126.5	1.82427e-15
	70457.9	1.52234e-15
	71744.8	1.11266e-15
	72992.1	7.27291e-16
	74202.8	4.29805e-16
	75378.5	2.31055e-16
	76519.4	1.13413e-16
	77625.2	5.10011e-17
	78694.7	2.10976e-17
	79725.5	8.07685e-18
	80714.6	2.88666e-18
	81657.6	9.75498e-19
	82548.8	3.17553e-19
	83381.3	1.02306e-19
	84147	3.39106e-20
	84836	1.21697e-20
	85435.6	5.04049e-21
	85463.4	1.10694e-29
	85599	3.12553e-29
	85750.4	2.6805e-27
	62582.4	2.10823e-22
	64108	1.74889e-22
	65555.2	4.37622e-23
	66938.9	1.15086e-24
	68270.3	5.61199e-23
	69557.1	1.36687e-22
	70804.5	1.8495e-22
	72015.2	1.85462e-22
	73190.8	1.52305e-22
	74331.8	1.0745e-22
	75437.6	6.698e-23
	76507	3.76391e-23
	77537.9	1.93981e-23
	78527	9.32329e-24
	79469.9	4.25345e-24
	80361.1	1.87709e-24
	81193.7	8.17674e-25
	81959.4	3.59056e-25
	82648.3	1.62455e-25
	83248	7.81965e-26
	83275.8	1.72527e-34
	83411.3	4.98082e-34
	83562.7	4.34956e-32
	60422.5	3.89179e-29
	61948.1	2.66985e-30
	63395.3	7.85579e-30
	64779	2.07064e-29
	66110.4	1.41717e-29
	67397.2	2.29726e-30
	68644.6	1.21274e-30
	69855.3	1.0996e-29
	71030.9	2.25572e-29
	72171.9	2.8564e-29
	73277.7	2.75524e-29
	74347.1	2.20744e-29
	75378	1.54213e-29
	76367.1	9.71486e-30
	77310	5.66883e-30
	78201.2	3.13706e-30
	79033.8	1.68164e-30
	79799.5	8.90227e-31
	80488.4	4.7395e-31
	81088.1	2.60878e-31
	81115.9	5.78839e-40
	81251.4	1.7195e-39
	81402.8	1.55313e-37
	58260.7	4.18942e-36
	59786.3	1.10418e-36
	61233.5	3.30781e-36
	62617.2	5.15041e-37
	63948.6	5.51181e-37
	65235.5	2.54042e-36
	66482.8	2.50854e-36
	67693.5	8.38469e-37
	68869.1	1.86495e-39
	70010.1	9.22176e-37
	71115.9	2.65788e-36
	72185.3	3.93859e-36
	73216.2	4.22407e-36
	74205.3	3.70408e-36
	75148.3	2.83195e-36
	76039.4	1.96857e-36
	76872	1.28337e-36
	77637.7	8.03996e-37
	78326.6	4.94068e-37
	78926.3	3.06438e-37
	78954.1	6.83409e-46
	79089.7	2.08335e-45
	79241.1	1.94192e-43
	56075.3	2.41075e-43
	57600.9	5.19338e-43
	59048.1	6.09706e-44
	60431.7	2.04964e-43
	61763.1	3.48797e-43
	63050	5.4894e-44
	64297.3	6.02534e-44
	65508	3.03742e-43
	66683.7	3.31509e-43
	67824.6	1.35217e-43
	68930.4	2.09049e-45
	69999.9	7.52029e-44
	71030.7	2.6798e-43
	72019.8	4.32992e-43
	72962.8	4.95548e-43
	73854	4.63944e-43
	74686.5	3.81744e-43
	75452.2	2.88479e-43
	76141.2	2.06503e-43
	76740.8	1.44893e-43
	77055.6	9.78629e-50
	55389.8	5.28263e-50
	56837	1.42065e-50
	58220.6	3.67923e-50
	60838.9	2.92977e-50
	62086.2	3.09236e-50
	65613.5	3.38678e-50
	66719.3	3.46801e-50
	67788.8	1.43682e-50
	70751.7	2.18183e-50
	71642.9	3.68457e-50
	72475.4	4.40068e-50
	73241.1	4.3312e-50
	73930.1	3.77816e-50
	74529.7	3.08309e-50
	64727.8	3.90009e-16
	66253.7	8.57621e-16
	67701.3	1.11144e-15
	69085.3	1.10269e-15
	70417	9.18936e-16
	71704.1	6.70703e-16
	72951.7	4.37742e-16
	74162.7	2.58273e-16
	75338.6	1.38597e-16
	76479.8	6.78954e-17
	77585.9	3.04633e-17
	78655.7	1.25705e-17
	79686.9	4.79841e-18
	80676.4	1.7093e-18
	81619.9	5.75443e-19
	82511.6	1.86506e-19
	83344.7	5.97956e-20
	84111.1	1.97178e-20
	84800.7	7.03486e-21
	85401.1	2.87848e-21
	85437.1	4.00211e-30
	85572.7	1.75077e-29
	85723.9	1.49612e-27
	62540.3	1.27883e-22
	64066.3	1.05682e-22
	65513.9	2.62013e-23
	66897.9	7.59295e-25
	68229.5	3.43704e-23
	69516.7	8.31755e-23
	70764.3	1.1218e-22
	71975.3	1.12217e-22
	73151.1	9.19572e-23
	74292.3	6.4738e-23
	75398.5	4.02708e-23
	76468.2	2.25819e-23
	77499.5	1.1612e-23
	78489	5.56786e-24
	79432.4	2.53403e-24
	80324.1	1.11548e-24
	81157.3	4.84635e-25
	81923.6	2.12194e-25
	82613.3	9.56096e-26
	83213.7	4.54784e-26
	83249.6	6.36124e-35
	83385.2	2.84442e-34
	83536.5	2.47221e-32
	60380.7	2.36042e-29
	61906.7	1.58776e-30
	63354.2	4.81923e-30
	64738.2	1.25791e-29
	66069.9	8.54535e-30
	67357.1	1.35461e-30
	68604.6	7.68469e-31
	69815.6	6.75475e-30
	70991.5	1.37622e-29
	72132.7	1.73599e-29
	73238.9	1.66964e-29
	74308.6	1.33437e-29
	75339.9	9.30045e-30
	76329.4	5.84617e-30
	77272.8	3.40413e-30
	78164.5	1.87991e-30
	78997.6	1.00562e-30
	79764	5.31085e-31
	80453.7	2.81676e-31
	81054.1	1.53225e-31
	81090	2.15901e-40
	81225.6	9.93412e-40
	81376.8	8.92222e-38
	58219.3	2.5425e-36
	59745.3	6.79614e-37
	61192.9	2.00992e-36
	62576.9	3.06533e-37
	63908.5	3.42959e-37
	65195.7	1.55244e-36
	66443.3	1.51998e-36
	67654.3	5.00515e-37
	68830.1	1.79446e-39
	69971.4	5.73417e-37
	71077.5	1.63249e-36
	72147.3	2.40617e-36
	73178.5	2.5714e-36
	74168	2.24857e-36
	75111.4	1.71497e-36
	76003.1	1.18956e-36
	76836.3	7.73886e-37
	77602.6	4.83677e-37
	78292.3	2.96103e-37
	78892.7	1.81446e-37
	78928.6	2.57378e-46
	79064.2	1.21542e-45
	79215.5	1.12531e-43
	56034.3	1.46467e-43
	57560.3	3.17725e-43
	59007.9	3.64067e-44
	60391.9	1.26423e-43
	61723.6	2.12369e-43
	63010.7	3.25611e-44
	64258.3	3.78606e-44
	65469.3	1.86585e-43
	66645.2	2.01692e-43
	67786.4	8.10955e-44
	68892.5	1.04303e-45
	69962.3	4.73716e-44
	70993.5	1.65763e-43
	71983	2.6606e-43
	72926.4	3.03256e-43
	73818.2	2.83052e-43
	74651.3	2.32302e-43
	75417.6	1.75064e-43
	76107.3	1.24801e-43
	76707.7	8.64769e-44
	77030.5	5.71915e-50
	55349.8	3.23052e-50
	58181.3	2.24583e-50
	60800.1	1.80901e-50
	62047.7	1.88393e-50
[truncated: 17,838 more rows]

## Sheet: B-X_Adiabatic
	86866.6	1.3186e-16
	88862	2.00176e-19
	90555.1	6.43083e-20
	91703.6	5.04324e-19
	92547.1	4.59692e-19
	93148.5	2.36001e-19
	93578.5	9.02426e-20
	93888	3.39019e-20
	86858.9	1.2939e-16
	88854.4	1.95324e-19
	90547.7	6.31573e-20
	91696.6	4.95321e-19
	92540.3	4.51191e-19
	93142.1	2.31362e-19
	93572.4	8.8299e-20
	93882.1	3.30182e-20
	86870.4	2.58805e-16
	88865.6	3.97338e-19
	90558.3	1.26017e-19
	91706.1	9.88272e-19
	92549	9.01984e-19
	93149.8	4.64131e-19
	93579.2	1.78141e-19
	93888.2	6.75519e-20
	86855	2.49212e-16
	88850.4	3.78335e-19
	90543.6	1.21547e-19
	91692.1	9.53205e-19
	92535.5	8.68863e-19
	93136.9	4.46025e-19
	93566.9	1.70559e-19
	93876.4	6.40741e-20
	86874.1	3.73878e-16
	88869.1	5.83677e-19
	90561.2	1.81604e-19
	91707.9	1.42417e-18
	92550	1.30244e-18
	93149.9	6.72464e-19
	93578.2	2.59562e-19
	93886.5	9.98208e-20
	86851.1	3.53278e-16
	88846.3	5.42379e-19
	90539.1	1.72021e-19
	91686.9	1.34907e-18
	92529.7	1.23132e-18
	93130.5	6.33566e-19
	93559.9	2.43175e-19
	93868.9	9.221e-20
	86877.8	4.71158e-16
	88872.4	7.51961e-19
	90563.8	2.28119e-19
	91709.1	1.78872e-18
	92549.9	1.64003e-18
	93148.7	8.50683e-19
	93575.7	3.30794e-19
	93883	1.29639e-19
	86847.1	4.36868e-16
	88842.1	6.82009e-19
	90534.2	2.12205e-19
	91680.9	1.66409e-18
	92523	1.52181e-18
	93122.9	7.85763e-19
	93551.2	3.0329e-19
	93859.5	1.16639e-19
	86881.4	5.46244e-16
	88875.6	8.95902e-19
	90566	2.63429e-19
	91709.5	2.06508e-18
	92549	1.89974e-18
	93146.2	9.90919e-19
	93571.6	3.88878e-19
	93877.7	1.56065e-19
	86843.1	4.9702e-16
	88837.7	7.93241e-19
	90529.1	2.40651e-19
	91674.3	1.88695e-18
	92515.2	1.73014e-18
	93114	8.97401e-19
	93541	3.48964e-19
	93848.3	1.36755e-19
	86885	5.96642e-16
	88878.7	1.01061e-18
	90567.9	2.8637e-19
	91709.2	2.24424e-18
	92547	2.07246e-18
	93142.4	1.0883e-18
	93565.8	4.31742e-19
	93870.6	1.78334e-19
	86839	5.32703e-16
	88833.2	8.73707e-19
	90523.6	2.56904e-19
	91667.1	2.01402e-18
	92506.5	1.85263e-18
	93103.7	9.66383e-19
	93529.1	3.7925e-19
	93835.3	1.52205e-19
	86888.6	6.21765e-16
	88881.6	1.09285e-18
	90569.4	2.96804e-19
	91708.2	2.32498e-18
	92544	2.15661e-18
	93137.3	1.14119e-18
	93558.5	4.58365e-19
	93861.8	1.95888e-19
	86834.9	5.4475e-16
	88828.6	9.22741e-19
	90517.7	2.61465e-19
	91659.1	2.04914e-18
	92496.8	1.89237e-18
	93092.3	9.93695e-19
	93515.7	3.94208e-19
	93820.5	1.62836e-19
	86892.1	6.22886e-16
	88884.5	1.14116e-18
	90570.6	2.95522e-19
	91706.6	2.31337e-18
	92540.1	2.15663e-18
	93131	1.15109e-18
	93549.5	4.68778e-19
	93851.3	2.08388e-19
	86830.7	5.35518e-16
	88823.8	9.41282e-19
	90511.6	2.55638e-19
	91650.4	2.00259e-18
	92486.2	1.85758e-18
	93079.5	9.82956e-19
	93500.6	3.94814e-19
	93804	1.68731e-19
	86895.5	6.02813e-16
	88887.1	1.15596e-18
	90571.5	2.84063e-19
	91704.2	2.22154e-18
	92535.1	2.0825e-18
	93123.3	1.12218e-18
	93538.8	4.63967e-19
	93839.1	2.15721e-19
	86826.5	5.08566e-16
	88818.9	9.31731e-19
	90505.1	2.41288e-19
	91641	1.88884e-18
	92474.5	1.76083e-18
	93065.4	9.39869e-19
	93483.9	3.82758e-19
	93785.7	1.70141e-19
	86898.9	5.65419e-16
	88889.6	1.13937e-18
	90572	2.64487e-19
	91701.1	2.0659e-18
	92529.1	1.94831e-18
	93114.3	1.06074e-18
	93526.6	4.45735e-19
	93825.3	2.17993e-19
	86822.2	4.68096e-16
	88813.8	8.97668e-19
	90498.2	2.20591e-19
	91630.9	1.72521e-18
	92461.8	1.61719e-18
	93050	8.71459e-19
	93465.5	3.6031e-19
	93765.8	1.67516e-19
	86902.3	5.1527e-16
	88892	1.09497e-18
	90572.2	2.3912e-19
	91697.3	1.86463e-18
	92522.1	1.76999e-18
	93103.9	9.74348e-19
	93512.6	4.165e-19
	93809.9	2.15525e-19
	86817.9	4.18598e-16
	88808.6	8.43509e-19
	90491	1.95806e-19
	91620.1	1.52943e-18
	92448.1	1.44243e-18
	93033.3	7.8533e-19
	93445.6	3.30006e-19
	93744.3	1.61392e-19
	86905.5	4.56991e-16
	88894.3	1.02753e-18
	90572	2.10289e-19
	91692.8	1.63621e-18
	92514.1	1.56402e-18
	93092.2	8.71114e-19
	93496.9	3.79054e-19
	93793.1	2.08773e-19
	86813.5	3.64306e-16
	88803.3	7.74194e-19
	90483.4	1.69067e-19
	91608.6	1.31837e-18
	92433.4	1.25146e-18
	93015.2	6.88942e-19
	93423.9	2.94503e-19
	93721.2	1.52389e-19
	86908.8	3.94985e-16
	88896.4	9.42507e-19
	90571.4	1.80162e-19
	91687.5	1.39792e-18
	92505	1.34608e-18
	93079.2	7.5891e-19
	93479.6	3.36294e-19
	93774.9	1.9833e-19
	86809.1	3.08983e-16
	88797.9	6.94766e-19
	90475.5	1.4219e-19
	91596.3	1.10642e-18
	92417.7	1.05758e-18
	92995.8	5.89029e-19
	93400.5	2.56314e-19
	93696.7	1.41167e-19
	86912	3.33043e-16
	88898.3	8.45649e-19
	90570.4	1.50521e-19
	91681.5	1.16387e-18
	92494.8	1.12933e-18
	93064.7	6.44795e-19
	93460.4	2.91006e-19
	93755.3	1.84879e-19
	86804.6	2.55652e-16
	88792.2	6.10082e-19
	90467.2	1.16617e-19
	91583.4	9.04847e-19
	92400.8	8.71328e-19
	92975	4.91243e-19
	93375.4	2.17682e-19
	93670.7	1.2838e-19
	86915.1	2.74163e-16
	88900.1	7.42578e-19
	90569.1	1.22749e-19
	91674.7	9.45067e-19
	92483.6	9.24354e-19
	93048.8	5.34618e-19
	93439.5	2.45708e-19
	93734.6	1.69157e-19
	86800.1	2.06523e-16
	88786.5	5.24405e-19
	90458.6	9.3343e-20
	91569.6	7.21799e-19
	92383	7.00386e-19
	92952.8	3.99884e-19
	93348.6	1.80475e-19
	93643.5	1.14662e-19
	86918.1	2.20506e-16
	88901.7	6.38406e-19
	90567.4	9.77812e-20
	91667.2	7.48897e-19
	92471.2	7.38493e-19
	93031.4	4.32762e-19
	93416.7	2.02469e-19
	93712.8	1.51898e-19
	86795.5	1.62994e-16
	88780.5	4.41489e-19
	90449.5	7.29807e-20
	91555.2	5.61876e-19
	92364	5.49593e-19
	92929.2	3.17867e-19
	93319.9	1.46093e-19
	93615.1	1.00579e-19
	86921.1	1.73357e-16
	88903.2	5.3753e-19
	90565.3	7.61348e-20
	91658.9	5.79434e-19
	92457.7	5.76171e-19
	93012.6	3.42113e-19
	93392	1.62837e-19
	93690.1	1.3383e-19
	86790.9	1.25747e-16
	88774.5	3.64064e-19
	90440.1	5.57647e-20
	91539.9	4.2709e-19
	92343.9	4.21175e-19
	92904.1	2.46817e-19
	93289.4	1.15475e-19
	93585.6	8.66343e-20
	86924.1	1.33286e-16
	88904.5	4.43297e-19
	90562.7	5.7976e-20
	91649.8	4.37883e-19
	92443.1	4.39157e-19
	92992.2	2.64179e-19
	93365.3	1.27844e-19
	93666.6	1.15625e-19
	86786.1	9.48722e-17
	88768.2	2.94175e-19
	90430.3	4.16673e-20
	91523.9	3.17117e-19
	92322.7	3.1536e-19
	92877.6	1.87247e-19
	93257	8.91267e-20
	93555.1	7.32491e-20
	86926.9	1.00255e-16
	88905.7	3.5816e-19
	90559.8	4.31987e-20
	91639.9	3.2337e-19
	92427.3	3.27061e-19
	92970.2	1.99292e-19
	93336.7	9.79998e-20
	93642.4	9.78977e-20
	86781.3	7.00266e-17
	88761.8	2.32909e-19
	90420	3.04607e-20
	91507.1	2.30089e-19
	92300.4	2.30742e-19
	92849.5	1.3881e-19
	93222.6	6.71766e-20
	93523.9	6.07555e-20
	86929.7	7.37964e-17
	88906.6	2.83525e-19
	90556.4	3.15083e-20
	91629.2	2.3338e-19
	92410.3	2.38078e-19
	92946.7	1.46885e-19
	93305.9	7.33679e-20
	93617.8	8.11679e-20
	86776.5	5.05823e-17
	88755.2	1.80721e-19
	90409.4	2.17968e-20
	91489.5	1.63162e-19
	92276.9	1.6504e-19
	92819.8	1.00562e-19
	93186.2	4.94508e-20
	93492	4.93993e-20
	86932.4	5.31734e-17
	88907.4	2.19915e-19
	90552.6	2.25071e-20
	91617.7	1.64671e-19
	92392.1	1.6939e-19
	92921.5	1.0577e-19
	93273.1	5.36743e-20
	93592.8	6.58441e-20
	86771.5	3.57653e-17
	88748.5	1.37419e-19
	90398.3	1.52717e-20
	91471.1	1.13122e-19
	92252.2	1.15396e-19
	92788.5	7.11968e-20
	93147.8	3.55626e-20
	93459.6	3.9343e-20
	86935	3.75135e-17
	88908	1.67138e-19
	90548.3	1.57516e-20
	91605.3	1.13603e-19
	92372.6	1.17824e-19
	92894.6	7.441e-20
	93238.1	3.83979e-20
	93567.6	5.22208e-20
	86766.5	2.47608e-17
	88741.5	1.02409e-19
	90386.7	1.04817e-20
	91451.8	7.66882e-20
	92226.2	7.88889e-20
	92755.6	4.92583e-20
	93107.2	2.49969e-20
	93426.9	3.06651e-20
	86937.5	2.59184e-17
	88908.4	1.24478e-19
	90543.5	1.08038e-20
	91592.1	7.664e-20
	92351.8	8.01273e-20
	92865.9	5.11395e-20
	93200.9	2.68881e-20
	93542.5	4.04607e-20
	86761.4	1.67871e-17
	88734.4	7.47971e-20
	90374.7	7.0494e-21
	91431.7	5.08422e-20
	92199	5.27321e-20
	92721	3.33025e-20
	93064.5	1.71852e-20
	93394.1	2.33716e-20
	86940	1.75395e-17
	88908.6	9.08421e-20
	90538.2	7.26529e-21
	91578	5.0572e-20
	92329.7	5.32756e-20
	92835.4	3.43314e-20
	93161.5	1.84508e-20
	93517.4	3.06081e-20
	86756.3	1.11479e-17
	88727.1	5.35418e-20
	90362.2	4.64739e-21
	91410.8	3.29695e-20
	92170.6	3.44706e-20
	92684.6	2.19991e-20
	93019.6	1.15666e-20
	93361.2	1.74055e-20
	86942.3	1.16273e-17
	88908.6	6.49646e-20
	90532.5	4.79178e-21
	91563	3.26389e-20
	92306.3	3.46337e-20
	92803.1	2.25097e-20
	93120	1.24239e-20
	93492.6	2.25971e-20
	86751	7.25223e-18
	88719.6	3.75632e-20
	90349.2	3.0044e-21
	91389	2.09117e-20
	92140.7	2.20319e-20
	92646.4	1.41973e-20
	92972.5	7.63029e-21
	93328.4	1.26578e-20
	86944.6	7.55209e-18
	88908.4	4.5527e-20
	90526.2	3.10078e-21
	91547	2.06051e-20
	92281.5	2.20121e-20
	92768.8	1.44113e-20
	93076.3	8.22046e-21
	93468.1	1.62765e-20
	86745.6	4.62229e-18
	88711.9	2.58276e-20
	90335.8	1.9051e-21
	91366.2	1.29761e-20
	92109.6	1.37699e-20
	92606.3	8.94981e-21
	92923.2	4.93979e-21
	93295.9	8.98464e-21
	86946.8	4.80645e-18
	88908	3.12666e-20
	90519.4	1.96927e-21
	91530.2	1.2726e-20
	92255.2	1.36774e-20
	92732.5	9.00696e-21
	93030.6	5.35216e-21
	93444.1	1.1436e-20
	86740.2	2.88686e-18
	88704	1.74045e-20
	90321.8	1.18537e-21
	91342.6	7.87738e-21
	92077	8.41569e-21
	92564.3	5.50972e-21
	92871.9	3.14283e-21
	93263.7	6.22257e-21
	86948.8	2.99774e-18
	88907.4	2.10413e-20
	90512	1.22786e-21
	91512.4	7.68977e-21
	92227.4	8.30808e-21
	92694.1	5.4934e-21
	92982.9	3.4333e-21
	93420.6	7.83851e-21
	86734.6	1.76688e-18
	88695.9	1.14941e-20
	90307.2	7.23976e-22
	91318	4.67885e-21
	92043	5.02867e-21
	92520.3	3.31155e-21
	92818.4	1.96782e-21
	93231.9	4.20485e-21
	86950.8	1.83242e-18
	88906.5	1.38766e-20
	90504	7.51871e-22
	91493.5	4.54589e-21
	92198.1	4.9325e-21
	92653.5	3.26816e-21
	92933.3	2.17217e-21
	93397.7	5.24148e-21
	86729	1.05987e-18
	88687.5	7.43961e-21
	90292.1	4.34137e-22
	91292.5	2.71896e-21
	92007.6	2.93781e-21
	92474.2	1.94249e-21
	92763	1.21404e-21
	93200.7	2.77184e-21
	86952.6	1.09788e-18
	88905.4	8.96778e-21
	90495.4	4.52317e-22
	91473.7	2.62915e-21
	92167.3	2.86229e-21
	92610.7	1.89557e-21
	92882	1.35641e-21
	93375.4	3.41972e-21
	86723.2	6.23138e-19
	88678.9	4.71912e-21
	90276.4	2.55713e-22
	91266	1.54608e-21
	91970.6	1.6776e-21
	92425.9	1.11156e-21
	92705.7	7.38793e-22
	93170.1	1.78273e-21
	86954.3	6.44756e-19
	88904	5.67959e-21
	90486.2	2.6742e-22
	91452.9	1.48775e-21
	92134.8	1.62284e-21
	92565.5	1.07123e-21
	92829.2	8.36251e-22
	93353.9	2.17733e-21
	86717.3	3.59126e-19
	88670.1	2.93365e-21
	90260.1	1.47975e-22
	91238.5	8.60113e-22
	91932	9.36371e-22
	92375.4	6.20167e-22
	92646.7	4.43779e-22
	93140.2	1.11883e-21
	86955.9	3.71198e-19
	88902.4	3.52481e-21
	90476.4	1.55436e-22
	91431	8.237e-22
	92100.6	8.98929e-22
	92517.8	5.89489e-22
	92775.1	5.0889e-22
	93333.1	1.3534e-21
	86711.3	2.0289e-19
	88661	1.78732e-21
	90243.2	8.41632e-23
	91209.9	4.6823e-22
	91891.8	5.10765e-22
	92322.5	3.3715e-22
	92586.2	2.63193e-22
	93110.9	6.85288e-22
	86957.3	2.09504e-19
	88900.5	2.14379e-21
	90465.8	8.88394e-23
	91408	4.46198e-22
	92064.7	4.86319e-22
	92467.6	3.157e-22
	92719.8	3.05437e-22
	93313.1	8.21383e-22
	86705.2	1.12375e-19
	88651.7	1.06715e-21
	90225.7	4.70617e-23
	91180.3	2.494e-22
	91849.9	2.72182e-22
	92267.1	1.78489e-22
	92524.4	1.54085e-22
	93082.4	4.09789e-22
	86958.7	1.15928e-19
	88898.4	1.27773e-21
	90454.6	4.9949e-23
	91383.9	2.36485e-22
	92026.9	2.56863e-22
	92414.6	1.6451e-22
	92663.6	1.80575e-22
	93293.8	4.8688e-22
	86698.9	6.10201e-20
	88642.1	6.24444e-22
	90207.4	2.58785e-23
	91149.6	1.2998e-22
	91806.2	1.41664e-22
	92209.2	9.1968e-23
	92461.4	8.89787e-23
	93054.6	2.3928e-22
	86959.8	6.28938e-20
	88896	7.46312e-22
	90442.6	2.7635e-23
	91358.6	1.2263e-22
	91987.3	1.32407e-22
	92358.9	8.34336e-23
	92606.8	1.0497e-22
	93275.4	2.81953e-22
	86692.5	3.24878e-20
	88632.3	3.58095e-22
	90188.4	1.4e-23
	91117.7	6.6282e-23
	91760.8	7.19953e-23
	92148.5	4.61107e-23
	92397.5	5.06132e-23
	93027.7	1.36472e-22
	86960.9	3.34564e-20
	88893.2	4.27181e-22
	90429.8	1.50478e-23
	91332.1	6.22152e-23
	91945.6	6.65757e-23
	92300.3	4.12278e-23
	92549.6	5.98799e-23
	93257.8	1.59566e-22
	86686	1.6959e-20
	88622.1	2.01252e-22
	90168.7	7.4527e-24
	91084.7	3.30719e-23
	91713.4	3.57092e-23
	92085	2.25015e-23
	92333	2.83103e-23
	93001.6	7.60443e-23
	86961.8	1.74507e-20
	88890.2	2.39628e-22
	90416.2	8.06722e-24
	91304.3	3.08825e-23
	91901.9	3.26321e-23
	92238.7	1.98908e-23
	92492.2	3.34541e-23
	93241.1	8.82659e-23
	86679.3	8.68074e-21
	88611.7	1.10848e-22
	90148.2	3.9049e-24
	91050.5	1.61454e-23
	91664.1	1.72774e-23
	92018.7	1.06993e-23
	92268.1	1.55398e-23
	92976.3	4.14105e-23
	86962.5	8.92532e-21
	88886.9	1.31735e-22
	90401.8	4.25877e-24
	91275.3	1.49981e-23
	91856	1.55789e-23
	92174.3	9.39943e-24
	92434.9	1.82745e-23
	93225.3	4.77397e-23
	86672.5	4.35707e-21
	88600.9	5.98359e-23
	90127	2.01453e-24
	91015	7.71207e-24
	91612.6	8.14913e-24
	91949.4	4.96731e-24
	92203	8.35453e-24
	92951.8	2.2044e-23
	86963	4.47651e-21
	88883.2	7.09728e-23
	90386.5	2.21449e-24
	91244.8	7.12626e-24
	91807.7	7.23684e-24
	92107	4.36864e-24
	92377.7	9.74884e-24
	93210.3	2.52498e-23
	86665.5	2.14453e-21
	88589.9	3.16547e-23
	90104.8	1.02343e-24
	90978.3	3.60422e-24
	91559	3.74391e-24
	91877.3	2.25891e-24
	92137.9	4.39178e-24
	92928.3	1.1473e-23
	86963.4	2.20173e-21
	88879.2	3.74738e-23
	90370.3	1.13429e-24
	91213	3.31284e-24
	91756.9	3.26658e-24
	92037.1	2.0064e-24
	92320.8	5.07549e-24
	93196.2	1.30642e-23
	86658.3	1.03511e-21
	88578.5	1.64123e-23
	90081.8	5.12128e-25
	90940.1	1.64809e-24
	91503	1.6737e-24
	91802.3	1.01035e-24
	92073	2.25467e-24
	92905.6	5.84e-24
	86963.6	1.06197e-21
	88874.8	1.93916e-23
	90353.1	5.72452e-25
	91179.7	1.50675e-24
	91703.3	1.43019e-24
	91964.8	9.14903e-25
	92264.2	2.57871e-24
	93182.9	6.61288e-24
	86651	4.89956e-22
	88566.8	8.33976e-24
	90057.9	2.5246e-25
	90900.6	7.37337e-25
	91444.5	7.27056e-25
	91724.6	4.46584e-25
	92008.3	1.12969e-24
	92883.7	2.90782e-24
	86963.6	5.02332e-22
	88870.1	9.83431e-24
	90334.9	2.84672e-25
	91144.9	6.70509e-25
	91646.8	6.05979e-25
	91890.4	4.15857e-25
	92208.1	1.27863e-24
	93170.6	3.27574e-24
	86643.5	2.27443e-22
	88554.7	4.15338e-24
	90032.9	1.22621e-25
	90859.6	3.22755e-25
	91383.2	3.0636e-25
	91644.6	1.95985e-25
	91944.1	5.52377e-25
	92862.8	1.41663e-24
	86963.4	2.33033e-22
	88865	4.88805e-24
	90315.6	1.39492e-25
	91108.4	2.91936e-25
	91587	2.47761e-25
	91814.3	1.88876e-25
	92152.6	6.1904e-25
	93159.1	1.5882e-24
	86635.8	1.03543e-22
	88542.3	2.02727e-24
	90007	5.86867e-26
	90817	1.38232e-25
	91318.9	1.2493e-25
	91562.5	8.57359e-26
	91880.3	2.63621e-25
	92842.7	6.75375e-25
	86963.1	1.06023e-22
	88859.5	2.38115e-24
	90295.1	6.73553e-26
	91070.1	1.24366e-25
	91523.4	9.74394e-26
	91737.1	8.57084e-26
	92097.5	2.92794e-25
	93148.6	7.53792e-25
	86627.9	4.62316e-23
	88529.4	9.69811e-25
	89980	2.76777e-26
	90772.8	5.7927e-26
	91251.4	4.91621e-26
	91478.8	3.7478e-26
	91817	1.22845e-25
	92823.5	3.15157e-25
	86962.5	4.73088e-23
	88853.6	1.13686e-24
	90273.5	3.20465e-26
	91029.9	5.18369e-26
	91455.8	3.67679e-26
	91659.4	3.87322e-26
	92043.1	1.35346e-25
	93138.9	3.50302e-25
	86619.8	2.02448e-23
	88516.2	4.54715e-25
	89951.9	1.28633e-26
	90726.8	2.37517e-26
	91180.2	1.86098e-26
	91393.8	1.63694e-26
	91754.3	5.59203e-26
	92805.3	1.43975e-25
	86961.7	2.07042e-23
	88847.3	5.31957e-25
	90250.7	1.50236e-26
	90987.8	2.11383e-26
	91383.7	1.33097e-26
	91581.6	1.7319e-26
	91989.3	6.118e-26
	93130.1	1.59412e-25
	86611.5	8.69488e-24
	88502.6	2.0896e-25
	89922.5	5.89084e-27
	90678.9	9.52876e-27
	91104.8	6.75885e-27
	91308.4	7.11997e-27
	91692.1	2.48804e-26
	92787.9	6.43992e-26
	86960.6	8.88687e-24
	88840.5	2.43978e-25
	90226.5	6.93832e-27
	90943.4	8.43173e-27
	91306.8	4.64689e-27
	91504.4	7.60227e-27
	91936.2	2.70541e-26
	93122.2	7.10502e-26
	86602.9	3.66261e-24
	88488.6	9.41174e-26
	89892	2.65813e-27
	90629	3.74014e-27
	91025	2.35504e-27
	91222.9	3.06447e-27
	91630.6	1.08257e-26
	92771.4	2.8208e-26
	86959.4	3.74129e-24
	88833.3	1.09674e-25
	90201	3.15625e-27
	90896.6	3.28826e-27
	91225.1	1.58495e-27
	91428	3.25445e-27
	91883.9	1.17095e-26
	93115.2	3.102e-26
	86594.2	1.51326e-24
	88474.1	4.15479e-26
	89860.1	1.18163e-27
	90577	1.436e-27
	90940.4	7.91435e-28
	91138	1.29478e-27
	91569.8	4.60795e-27
	92755.8	1.21018e-26
	86957.8	1.54484e-24
	88825.6	4.83209e-26
	90174	1.41392e-27
	90847.1	1.2525e-27
	91138.7	5.39155e-28
	91352.6	1.35466e-27
	91832.3	4.9623e-27
	93109.1	1.32678e-26
	86585.2	6.1322e-25
	88459.1	1.79777e-26
	89826.8	5.17409e-28
	90522.5	5.39078e-28
	90851	2.59844e-28
	91053.9	5.33533e-28
	91509.7	1.91967e-27
	92741.1	5.08581e-27
	86956.1	6.25667e-25
	88817.3	2.08667e-26
	90145.4	6.23583e-28
	90794.5	4.64888e-28
	91048.3	1.87676e-28
	91278.2	5.48885e-28
	91781.6	2.06007e-27
	93103.9	5.56026e-27
	86576	2.43736e-25
	88443.7	7.62412e-27
	89792.1	2.23118e-28
	90465.2	1.97653e-28
	90756.9	8.50791e-29
	90970.8	2.13775e-28
	91450.5	7.83137e-28
	92727.3	2.09392e-27
	86954.1	2.48546e-25
	88808.6	8.83152e-27
	90115.2	2.70675e-28
	90738.3	1.67301e-28
	90954.5	6.8705e-29
	91204.5	2.17295e-28
	91731.7	8.38093e-28
	93099.6	2.28339e-27
	86566.5	9.50234e-26
	88427.8	3.16928e-27
	89755.8	9.47219e-29
	90404.9	7.06197e-29
	90658.7	2.8507e-29
	90888.6	8.33783e-29
	91392	3.12935e-28
	92714.3	8.44704e-28
	86951.8	9.68403e-26
	88799.3	3.66371e-27
	90083.3	1.15587e-28
	90677.5	5.77336e-29
	90858.5	2.71246e-29
	91131.4	8.4434e-29
	91682.7	3.34312e-28
	93096.2	9.18964e-28
	86556.8	3.63366e-26
	88411.3	1.29127e-27
	89717.9	3.95776e-29
	90341	2.44636e-29
	90557.2	1.00465e-29
	90807.2	3.17743e-29
	91334.4	1.22563e-28
	92702.3	3.33921e-28
	86949.2	3.70112e-26
	88789.5	1.48958e-27
	90049.5	4.8539e-29
	90610.9	1.86614e-29
	90761.8	1.17071e-29
	91059	3.23403e-29
	91634.7	1.30812e-28
	93093.6	3.62488e-28
	86546.8	1.36287e-26
	88394.3	5.15639e-28
	89678.3	1.62696e-29
	90272.5	8.1268e-30
	90453.5	3.81808e-30
	90726.4	1.18854e-29
	91277.7	4.70612e-29
	92691.2	1.29367e-28
	86946.3	1.38742e-26
	88779	5.93656e-28
	90013.7	2.00346e-29
	90536.1	5.41928e-30
	90666.7	5.4151e-30
	90987.1	1.22516e-29
	91587.6	5.02327e-29
	93092	1.40156e-28
	86536.5	5.01409e-27
	88376.7	2.0183e-28
	89636.8	6.57703e-30
	90198.2	2.52862e-30
	90349	1.58636e-30
	90646.3	4.38227e-30
	91222	1.77273e-29
	92680.9	4.91243e-29
	86943.2	5.10151e-27
	88767.9	2.3187e-28
	89975.9	8.12272e-30
	90450.8	1.36587e-30
	90575.9	2.49791e-30
	90915.9	4.60184e-30
	91541.6	1.89375e-29
	93091.2	5.31237e-29
	86525.9	1.80946e-27
	88358.6	7.74279e-29
	89593.3	2.61333e-30
	90115.7	7.06921e-31
	90246.3	7.0636e-31
	90566.7	1.59813e-30
	91167.2	6.55264e-30
	92671.5	1.82846e-29
	86939.7	1.83996e-27
	88756.2	8.87643e-29
	89935.7	3.23219e-30
	90354.2	3.13783e-31
	90490.1	1.06846e-30
	90845.4	1.71671e-30
	91496.6	7.01272e-30
	93091.3	1.97407e-29
	86515	6.40498e-28
	88339.8	2.91139e-29
	89547.7	1.01998e-30
	90022.6	1.71508e-31
	90147.8	3.13663e-31
	90487.8	5.77879e-31
	91113.4	2.37823e-30
	92663	6.67187e-30
	86935.9	6.50925e-28
	88743.8	3.33056e-29
	89893.1	1.26095e-30
	90248.3	7.49728e-32
	90407.7	4.23459e-31
	90775.7	6.36673e-31
	91452.6	2.55184e-30
	93092.3	7.19238e-30
	86503.9	2.22385e-28
	88320.3	1.07297e-29
	89499.9	3.90721e-31
	89918.3	3.79322e-32
	90054.3	1.29162e-31
	90409.6	2.07534e-31
	91060.7	8.47808e-31
	92655.4	2.38677e-30
	86931.8	2.25875e-28
	88730.6	1.22472e-29
	89847.8	4.81471e-31
	90135.7	2.08999e-32
	90326	1.61336e-31
	90706.7	2.34881e-31
	91409.6	9.12807e-31
	93094.1	2.56946e-30
	86492.4	7.57383e-29
	88300.2	3.8756e-30
	89449.5	1.46744e-31
	89804.7	8.72511e-33
	89964.1	4.92815e-32
	90332.1	7.40974e-32
	91009	2.96997e-31
	92648.7	8.3715e-31
	86927.4	7.68824e-29
	88716.7	4.41361e-30
	89799.3	1.79338e-31
	90018.4	7.34489e-33
	90243.7	6.08035e-32
	90638.4	8.62135e-32
	91367.7	3.21068e-31
	93096.8	9.0011e-31
	86480.5	2.53012e-29
	88279.3	1.37202e-30
	89396.5	5.39413e-32
	89684.4	2.34155e-33
	89874.8	1.80757e-32
	90255.4	2.63163e-32
	90958.3	1.02276e-31
	92642.8	2.87918e-31
	86922.5	2.56683e-29
	88702	1.55869e-30
	89747.2	6.45692e-32
	89897.9	3.55852e-33
	90160.1	2.30111e-32
	90570.9	3.14818e-32
	91326.9	1.11094e-31
	93100.4	3.09222e-31
	86468.4	8.29077e-30
	88257.7	4.7599e-31
	89340.3	1.9343e-32
	89559.4	7.9222e-34
	89784.7	6.55822e-33
	90179.4	9.2992e-33
	90908.7	3.46339e-32
	92637.8	9.71e-32
	86917.4	8.40607e-30
	88686.4	5.39418e-31
	89689.4	2.14423e-32
	89776.3	2.87286e-33
	90075	8.80585e-33
	90504.1	1.14324e-32
	91287.2	3.7819e-32
	93104.9	1.04182e-31
	86455.8	2.66484e-30
	88235.3	1.61835e-31
	89280.5	6.70464e-33
	89431.2	3.69503e-34
	89693.4	2.38948e-33
	90104.2	3.2691e-33
	90860.2	1.15362e-32
	92633.7	3.21146e-32
	86911.8	2.70034e-30
	88670	1.8292e-31
	89614.8	4.03211e-33
	89664.6	4.42547e-33
	89988.5	3.41398e-33
	90437.9	4.12596e-33
	91248.5	1.26693e-32
	93110.2	3.4425e-32
	86442.9	8.402e-31
	88212	5.39198e-32
	89214.9	2.14361e-33
	89301.9	2.87192e-34
	89600.5	8.80319e-34
	90029.7	1.14291e-33
	90812.8	3.78086e-33
	92630.4	1.04167e-32
	86905.9	8.50849e-31
	88652.5	6.07725e-32
	89501.1	2.37782e-34
	89585	2.61922e-33
	89901.2	1.3382e-33
	90372.2	1.47848e-33
	91210.9	4.17742e-33
	93116.3	1.11571e-32
	86429.7	2.59836e-31
	88187.8	1.76029e-32
	89132.7	3.88053e-34
	89182.4	4.25915e-34
	89506.4	3.28571e-34
	89955.8	3.97108e-34
	90766.4	1.21943e-33
	92628	3.31378e-33
	86899.5	2.62964e-31
	88634.1	1.97793e-32
	89371.1	2.42323e-35
	89514.2	9.09759e-34
	89813.6	5.27415e-34
	90307	5.25377e-34
	91174.3	1.35581e-33
	93123.4	3.54676e-33
	86416	7.88214e-32
	88162.7	5.63057e-33
	89011.2	2.20313e-35
	89095.2	2.42674e-34
	89411.3	1.23994e-34
	89882.3	1.36995e-34
	90721	3.87101e-34
	92626.5	1.03397e-33
	86892.7	7.97196e-32
	88614.5	6.30558e-33
	89236.3	3.94945e-36
	89440.3	2.90794e-34
	89726.3	2.07161e-34
	90242.2	1.84878e-34
	91138.7	4.33134e-34
	93131.2	1.10595e-33
	86401.9	2.34536e-32
	88136.5	1.76434e-33
	88873.6	2.16164e-36
	89016.6	8.11567e-35
	89316	4.70487e-35
	89809.4	4.6868e-35
	90676.7	1.20956e-34
	92625.8	3.16451e-34
	86885.5	2.37047e-32
	88593.7	1.96846e-33
	89098.4	8.55945e-37
	89361.2	8.89567e-35
	89639.9	8.02239e-35
	90177.8	6.43256e-35
	91104.2	1.36203e-34
	93139.9	3.38282e-34
	86387.5	6.84537e-33
	88109.2	5.41518e-34
	88731.1	3.39176e-37
	88935	2.49747e-35
	89221	1.77916e-35
	89736.9	1.58786e-35
	90633.5	3.72037e-35
	92625.9	9.50029e-35
	86877.9	6.91405e-33
	88571.6	6.01591e-34
	88957.7	2.33559e-37
	89276.2	2.63307e-35
	89554.8	3.03071e-35
	90113.7	2.20978e-35
	91070.6	4.21525e-35
	93149.5	1.01504e-34
	86372.5	1.95973e-33
	88080.7	1.62755e-34
	88585.4	7.07742e-38
	88848.2	7.35539e-36
	89126.9	6.6336e-36
	89664.8	5.319e-36
	90591.2	1.12628e-35
	92626.9	2.79777e-35
	86869.8	1.97798e-33
	88548	1.79901e-34
	88814.5	8.32895e-38
	89185.3	7.63698e-36
	89471.1	1.10888e-35
	90050	7.48277e-36
	91038	1.28381e-35
	93159.9	2.98787e-35
	86357.2	5.50309e-34
	88050.9	4.78874e-35
	88437	1.85933e-38
	88755.5	2.09617e-36
	89034.1	2.41267e-36
	89593	1.75919e-36
	90549.9	3.35606e-36
	92628.8	8.0824e-36
	86861.2	5.55029e-34
	88522.9	5.25922e-35
	88668.8	4.8581e-38
	89088.6	2.20824e-36
	89388.7	3.91969e-36
	89986.6	2.49455e-36
	91006.3	3.84732e-36
	93171.1	8.62815e-36
	86341.4	1.51576e-34
	88019.6	1.37873e-35
	88286	6.38339e-39
	88656.8	5.8532e-37
	88942.7	8.49916e-37
	89521.6	5.73552e-37
	90509.5	9.84111e-37
	92631.4	2.29059e-36
	86852.1	1.52762e-34
	88495.6	1.47582e-35
	88521.1	2.85068e-37
	88986.8	6.49844e-37
	89307.2	1.34084e-36
	89923.6	8.17648e-37
	90975.5	1.13417e-36
	93183.1	2.44436e-36
	86325.1	4.09502e-35
	87986.7	3.88066e-36
	88132.7	3.58474e-39
	88552.5	1.6295e-37
	88852.6	2.89244e-37
	89450.5	1.84082e-37
	90470.1	2.83934e-37
	92634.9	6.36844e-37
	86842.6	4.12387e-35
	88370.1	3.4123e-39
	88467.1	4.18973e-36
	88880.6	1.99339e-37
	89226.2	4.45635e-37
	89860.9	2.63222e-37
	90945.6	3.28837e-37
	93196	6.79385e-37
	86308.3	1.08513e-35
	87951.7	1.04844e-36
	87977.3	2.0252e-38
	88443	4.61686e-38
	88763.3	9.52629e-38
	89379.8	5.8091e-38
	90431.6	8.05885e-38
	92639.3	1.73708e-37
	86832.5	1.09188e-35
	88217.4	1.16583e-40
	88435.4	1.13626e-36
	88770.8	6.56225e-38
	89145.3	1.4456e-37
	89798.6	8.31614e-38
	90916.6	9.37463e-38
	93209.7	1.85261e-37
	86291	2.82032e-36
	87818.6	2.33396e-40
	87915.5	2.86576e-37
	88329.1	1.36351e-38
	88674.6	3.0483e-38
	89309.4	1.80061e-38
	90394	2.24958e-38
	92644.4	4.64849e-38
	86821.8	2.83554e-36
	88400.5	2.97095e-37
	88658.3	2.4159e-38
	89064.4	4.59583e-38
	89736.6	2.5764e-38
	90888.3	2.62727e-38
	93224.1	4.95642e-38
	86273.2	7.18978e-37
	87876.2	7.48291e-38
	88211.5	4.32162e-39
	88586	9.52043e-39
	89239.3	5.47713e-39
	90357.3	6.1748e-39
	92650.4	1.22045e-38
	86810.6	7.22208e-37
	88360.6	7.31607e-38
	88545	1.05924e-38
	88983.4	1.43652e-38
	89675	7.82278e-39
	90860.9	7.23613e-39
	93239.4	1.30101e-38
	86254.8	1.79771e-37
	87833.5	1.88376e-38
	88091.3	1.53184e-39
	88497.4	2.91413e-39
	89169.6	1.63374e-39
	90321.3	1.66613e-39
	92657.1	3.14372e-39
	86798.8	1.80411e-37
	88310.7	1.53759e-38
	88435.7	5.88559e-39
	88902.3	4.42376e-39
	89613.8	2.32683e-39
	90834.3	1.9582e-39
	93255.5	3.35055e-39
	86235.9	4.40842e-38
	87785.9	4.46625e-39
	88408.7	8.77e-40
	92664.7	7.94509e-40
	86786.4	4.41988e-38
	88237.2	1.98261e-39
	88343.9	3.2611e-39
	88821.4	1.34311e-39
	93272.4	8.46629e-40
	86216.4	1.06027e-38
	86773.4	1.06194e-38

## Sheet: B-X_Diabatic
	86926.1	1.95708e-17
	88994.7	1.31168e-18
	91074.6	6.33833e-25
	86918.4	1.9203e-17
	88986.9	1.28826e-18
	91066.9	8.79275e-25
	86930	3.84184e-17
	88998.5	2.56991e-18
	91078.4	4.81817e-25
	86914.5	3.69892e-17
	88983.1	2.47907e-18
	91063	1.19798e-24
	86934	5.55121e-17
	89002.3	3.70274e-18
	91082.1	5.7377e-27
	86910.8	5.24429e-17
	88979.2	3.50812e-18
	91059.1	6.57705e-25
	86938	6.99743e-17
	89006.2	4.64958e-18
	91085.8	1.09909e-24
	86907	6.48636e-17
	88975.3	4.32656e-18
	91055.1	6.70439e-27
	86942	8.11554e-17
	89010	5.36678e-18
	91089.5	7.02741e-24
	86903.3	7.38155e-17
	88971.5	4.9049e-18
	91051.1	1.15944e-24
	86946.1	8.8679e-17
	89013.8	5.83073e-18
	91093.2	2.18486e-23
	86899.6	7.91431e-17
	88967.6	5.23385e-18
	91047.1	6.85338e-24
	86950.2	9.24581e-17
	89017.6	6.03836e-18
	91096.8	4.94412e-23
	86896	8.09669e-17
	88963.7	5.32366e-18
	91043	1.9949e-23
	86954.3	9.26762e-17
	89021.4	6.00601e-18
	91100.4	9.24124e-23
	86892.4	7.96335e-17
	88959.8	5.20089e-18
	91038.9	4.25848e-23
	86958.5	8.97437e-17
	89025.2	5.76544e-18
	91104	1.51165e-22
	86888.8	7.56659e-17
	88955.9	4.90369e-18
	91034.8	7.54529e-23
	86962.7	8.42357e-17
	89029	5.35915e-18
	91107.5	2.23401e-22
	86885.2	6.96897e-17
	88952	4.47712e-18
	91030.7	1.17384e-22
	86966.9	7.68225e-17
	89032.8	4.83513e-18
	91111.1	3.04227e-22
	86881.7	6.23614e-17
	88948	3.96756e-18
	91026.5	1.65396e-22
	86971.2	6.81904e-17
	89036.5	4.24141e-18
	91114.6	3.86814e-22
	86878.2	5.4315e-17
	88944.1	3.41857e-18
	91022.4	2.15105e-22
	86975.4	5.89901e-17
	89040.3	3.62222e-18
	91118.1	4.63438e-22
	86874.7	4.61055e-17
	88940.1	2.86778e-18
	91018.2	2.61548e-22
	86979.7	4.97873e-17
	89044	3.01468e-18
	91121.6	5.26777e-22
	86871.3	3.81818e-17
	88936.1	2.34457e-18
	91014	2.99981e-22
	86984	4.10284e-17
	89047.7	2.4472e-18
	91125.1	5.70994e-22
	86867.9	3.08741e-17
	88932.1	1.86953e-18
	91009.8	3.26685e-22
	86988.4	3.30345e-17
	89051.4	1.93875e-18
	91128.6	5.92583e-22
	86864.5	2.43919e-17
	88928.1	1.45495e-18
	91005.6	3.39486e-22
	86992.7	2.60018e-17
	89055	1.49973e-18
	91132.1	5.90659e-22
	86861.1	1.88386e-17
	88924.1	1.10563e-18
	91001.3	3.37959e-22
	86997	2.00161e-17
	89058.6	1.1333e-18
	91135.7	5.66882e-22
	86857.7	1.423e-17
	88920	8.20781e-19
	90997.1	3.23265e-22
	87001.4	1.50753e-17
	89062.2	8.36843e-19
	91139.2	5.25037e-22
	86854.3	1.05162e-17
	88915.9	5.95449e-19
	90993	2.97868e-22
	87005.8	1.11122e-17
	89065.8	6.04029e-19
	91142.8	4.7005e-22
	86851	7.60616e-18
	88911.8	4.22247e-19
	90988.8	2.6492e-22
	87010.1	8.01842e-18
	89069.3	4.26252e-19
	91146.4	4.07368e-22
	86847.6	5.38553e-18
	88907.7	2.92758e-19
	90984.6	2.27831e-22
	87014.5	5.66556e-18
	89072.8	2.94142e-19
	91150	3.42204e-22
	86844.3	3.73386e-18
	88903.5	1.98497e-19
	90980.5	1.89714e-22
	87018.9	3.92052e-18
	89076.2	1.9852e-19
	91153.7	2.78922e-22
	86840.9	2.53532e-18
	88899.2	1.31633e-19
	90976.5	1.5315e-22
	87023.2	2.65749e-18
	89079.6	1.3106e-19
	91157.4	2.20794e-22
	86837.6	1.68628e-18
	88895	8.53929e-20
	90972.4	1.19982e-22
	87027.5	1.76474e-18
	89083	8.46395e-20
	91161.2	1.69878e-22
	86834.2	1.09882e-18
	88890.6	5.41933e-20
	90968.4	9.13034e-23
	87031.9	1.14828e-18
	89086.3	5.34759e-20
	91165.1	1.27124e-22
	86830.8	7.01557e-19
	88886.3	3.36492e-20
	90964.5	6.75404e-23
	87036.2	7.32171e-19
	89089.5	3.30563e-20
	91169	9.25833e-23
	86827.4	4.38939e-19
	88881.8	2.04426e-20
	90960.7	4.86001e-23
	87040.4	4.57533e-19
	89092.6	1.99933e-20
	91173.1	6.56568e-23
	86824	2.69153e-19
	88877.3	1.21525e-20
	90956.9	3.40384e-23
	87044.7	2.80232e-19
	89095.7	1.18313e-20
	91177.2	4.53578e-23
	86820.6	1.6176e-19
	88872.8	7.069e-21
	90953.2	2.32157e-23
	87048.9	1.68243e-19
	89098.8	6.85051e-21
	91181.4	3.05406e-23
	86817.1	9.52957e-20
	88868.2	4.02372e-21
	90949.6	1.54276e-23
	87053.1	9.90167e-20
	89101.7	3.88108e-21
	91185.7	2.00488e-23
	86813.6	5.50344e-20
	88863.5	2.24106e-21
	90946.1	9.99174e-24
	87057.2	5.71309e-20
	89104.6	2.15129e-21
	91190.2	1.28357e-23
	86810.1	3.11587e-20
	88858.7	1.22138e-21
	90942.7	6.30988e-24
	87061.3	3.2318e-20
	89107.4	1.16666e-21
	91194.7	8.01712e-24
	86806.5	1.72954e-20
	88853.9	6.51301e-22
	90939.4	3.88635e-24
	87065.3	1.79247e-20
	89110.1	6.18939e-22
	91199.5	4.88643e-24
	86802.8	9.41306e-21
	88848.9	3.39818e-22
	90936.3	2.33538e-24
	87069.2	9.74816e-21
	89112.7	3.21227e-22
	91204.3	2.90692e-24
	86799.1	5.02327e-21
	88843.9	1.7347e-22
	90933.3	1.36954e-24
	87073.1	5.19841e-21
	89115.2	1.63063e-22
	91209.4	1.68822e-24
	86795.4	2.62858e-21
	88838.8	8.66212e-23
	90930.5	7.83948e-25
	87076.9	2.71836e-21
	89117.6	8.09555e-23
	91214.6	9.57369e-25
	86791.5	1.34881e-21
	88833.6	4.23122e-23
	90927.8	4.38111e-25
	87080.7	1.39401e-21
	89119.9	3.93026e-23
	91220	5.30215e-25
	86787.7	6.78728e-22
	88828.3	2.02142e-23
	90925.3	2.39071e-25
	87084.3	7.01042e-22
	89122	1.86553e-23
	91225.5	2.86809e-25
	86783.7	3.34948e-22
	88822.9	9.44402e-24
	90923	1.27416e-25
	87087.9	3.45759e-22
	89124.1	8.65619e-24
	91231.3	1.51563e-25
	86779.6	1.62105e-22
	88817.3	4.31412e-24
	90920.8	6.63314e-26
	87091.4	1.67243e-22
	89126	3.92544e-24
	91237.3	7.82472e-26
	86775.5	7.69427e-23
	88811.7	1.92653e-24
	90918.9	3.37332e-26
	87094.7	7.9341e-23
	89127.8	1.73938e-24
	91243.6	3.94713e-26
	86771.2	3.58188e-23
	88805.9	8.40766e-25
	90917.2	1.67607e-26
	87098	3.69161e-23
	89129.5	7.52778e-25
	91250.1	1.94567e-26
	86766.9	1.63541e-23
	88800	3.58551e-25
	90915.7	8.13754e-27
	87101.1	1.68469e-23
	89131	3.18127e-25
	91256.8	9.37257e-27
	86762.4	7.32383e-24
	88793.9	1.4935e-25
	90914.5	3.86064e-27
	87104.1	7.54089e-24
	89132.4	1.31219e-25
	91263.8	4.41262e-27
	86757.8	3.2169e-24
	88787.7	6.07522e-26
	90913.5	1.79002e-27
	87107	3.31078e-24
	89133.6	5.28034e-26
	91271.1	2.03042e-27
	86753.1	1.38595e-24
	88781.4	2.41192e-26
	90912.8	8.11141e-28
	87109.7	1.42576e-24
	89134.7	2.07186e-26
	91278.7	9.13166e-28
	86748.3	5.85699e-25
	88774.9	9.34219e-27
	90912.4	3.59254e-28
	87112.3	6.02252e-25
	89135.6	7.9214e-27
	91286.5	4.01435e-28
	86743.3	2.42782e-25
	88768.3	3.5283e-27
	90912.2	1.55524e-28
	87114.8	2.49541e-25
	89136.4	2.9488e-27
	91294.7	1.72498e-28
	86738.2	9.87147e-26
	88761.5	1.2985e-27
	90912.4	6.58105e-29
	87117	1.0142e-25
	89136.9	1.0678e-27
	91303.2	7.24545e-29
	86732.9	3.93714e-26
	88754.5	4.65297e-28
	90912.9	2.72213e-29
	87119.1	4.04341e-26
	89137.4	3.75695e-28
	91312.1	2.97477e-29
	86727.5	1.54033e-26
	88747.4	1.62189e-28
	90913.7	1.10061e-29
	87121.1	1.58131e-26
	89137.6	1.28253e-28
	91321.3	1.19389e-29
	86721.8	5.91143e-27
	88740.1	5.49318e-29
	90914.8	4.34997e-30
	87122.8	6.06631e-27
	89137.6	4.24044e-29
	91330.9	4.68369e-30
	86716.1	2.22546e-27
	88732.6	1.80516e-29
	90916.3	1.6806e-30
	87124.3	2.28285e-27
	89137.5	1.35491e-29
	91340.8	1.79598e-30
	86710.1	8.2185e-28
	88724.9	5.74559e-30
	90918.2	6.34675e-31
	87125.6	8.42728e-28
	89137.2	4.17147e-30
	91351.2	6.7314e-31
	86703.9	2.97727e-28
	88717.1	1.76728e-30
	90920.4	2.34282e-31
	87126.8	3.05174e-28
	89136.7	1.2327e-30
	91361.9	2.46593e-31
	86697.5	1.05806e-28
	88709.1	5.23781e-31
	90923	8.45328e-32
	87127.7	1.08411e-28
	89136	3.47771e-31
	91373	8.8286e-32
	86690.9	3.68855e-29
	88700.8	1.49004e-31
	90926	2.98112e-32
	87128.3	3.77793e-29
	89135.1	9.29677e-32
	91384.6	3.08905e-32
	86684.1	1.26143e-29
	88692.4	4.04714e-32
	90929.5	1.02752e-32
	87128.7	1.29153e-29
	89134.1	2.32848e-32
	91396.6	1.05619e-32
	86677	4.23194e-30
	88683.8	1.04156e-32
	90933.3	3.46114e-33
	87128.9	4.33128e-30
	89132.8	5.36642e-33
	91409	3.52859e-33
	86669.7	1.39277e-30
	88675.1	2.51139e-33
	90937.6	1.13929e-33
	87128.8	1.42493e-30
	89131.3	1.10316e-33
	91421.9	1.15175e-33
	86662.2	4.49671e-31
	88666.1	5.5721e-34
	90942.3	3.66428e-34
	87128.4	4.59876e-31
	89129.6	1.9018e-34
	91435.2	3.67245e-34
	86654.4	1.42424e-31
	88656.9	1.10276e-34
	90947.5	1.15146e-34
	87127.8	1.456e-31
	89127.8	2.361e-35
	91449.1	1.14373e-34
	86646.3	4.42527e-32
	88647.5	1.83022e-35
	90953.1	3.53474e-35
	87126.9	4.52229e-32
	89125.7	1.13953e-36
	91463.4	3.47864e-35
	86637.9	1.34887e-32
	88637.9	2.18763e-36
	90959.2	1.05985e-35
	87125.6	1.37792e-32
	89123.5	1.08524e-37
	91478.2	1.03301e-35
	86629.3	4.03347e-33
	88628.2	1.01652e-37
	90965.8	3.10342e-36
	87124.1	4.11867e-33
	89121.1	4.7545e-37
	91493.4	2.99452e-36
	86620.4	1.18321e-33
	88618.2	9.32011e-39
	90972.9	8.87297e-37
	87122.2	1.20773e-33
	89118.4	4.26533e-37
	91509.2	8.47164e-37
	86611.1	3.40501e-34
	88608.1	3.93118e-38
	90980.4	2.47638e-37
	87120	3.47426e-34
	89115.6	2.52366e-37
	91525.5	2.3382e-37
	86601.5	9.61295e-35
	88597.7	3.39551e-38
	90988.5	6.74488e-38
	87117.5	9.80448e-35
	89112.6	1.21623e-37
	91542.4	6.29387e-38
	86591.6	2.66243e-35
	88587.2	1.93423e-38
	90997.1	1.79235e-38
	87114.6	2.71437e-35
	89109.4	5.15946e-38
	91559.7	1.65162e-38
	86581.4	7.23386e-36
	88576.5	8.97471e-39
	91006.2	4.6451e-39
	87111.4	7.37196e-36
	89106.1	1.99985e-38
	91577.6	4.22325e-39
	86570.8	1.92816e-36
	88565.6	3.66567e-39
	91015.9	1.1736e-39
	87107.7	1.96416e-36
	89102.6	7.23153e-39
	91596	1.05167e-39
	86559.8	5.04189e-37
	88554.5	1.36794e-39
	91026	2.88928e-40
	87103.7	5.13397e-37
	89098.9	2.47113e-39
	91615	2.54866e-40
	86548.5	1.29339e-37
	88543.3	4.76264e-40
	87099.3	1.31644e-37
	89095	8.04706e-40
	86536.7	3.25491e-38
	87094.5	3.3115e-38
	86524.6	8.03572e-39
	87089.3	8.17191e-39
	86512.1	1.94624e-39
	87083.7	1.97833e-39

## Sheet: C-X_Adiabatic
	91820.1	2.667e-15
	93864.3	1.28977e-17
	95830.2	9.05859e-21
	97584	2.98983e-20
	99075.2	2.63986e-22
	100374	3.07369e-20
	101537	5.57014e-20
	102740	2.57125e-20
	91812.4	2.60826e-15
	93856.7	1.25719e-17
	95822.6	9.05075e-21
	97576.6	2.92657e-20
	99067.9	2.54339e-22
	100367	3.01046e-20
	101530	5.4475e-20
	102733	2.51067e-20
	91823.8	5.21692e-15
	93868	2.53959e-17
	95833.7	1.69634e-20
	97587.2	5.83814e-20
	99078.1	5.31889e-22
	100377	5.9949e-20
	101540	1.08969e-19
	102743	5.0455e-20
	91808.5	4.98976e-15
	93852.7	2.41301e-17
	95818.6	1.69478e-20
	97572.4	5.59367e-20
	99063.6	4.93879e-22
	100363	5.7507e-20
	101526	1.04217e-19
	102729	4.81048e-20
	91827.6	7.48555e-15
	93871.6	3.68e-17
	95837.1	2.27535e-20
	97590.1	8.3545e-20
	99080.6	7.97111e-22
	100379	8.5638e-20
	101542	1.56367e-19
	102745	7.27369e-20
	91804.6	7.00182e-15
	93848.7	3.40848e-17
	95814.4	2.27675e-20
	97567.9	7.83568e-20
	99058.8	7.13881e-22
	100358	8.0464e-20
	101521	1.4625e-19
	102723	6.77185e-20
	91831.3	9.33748e-15
	93875.1	4.65074e-17
	95840.3	2.58386e-20
	97592.7	1.03836e-19
	99082.6	1.05199e-21
	100380	1.06195e-19
	101543	1.95062e-19
	102746	9.13032e-20
	91800.6	8.54182e-15
	93844.6	4.19929e-17
	95810.1	2.59644e-20
	97563.1	9.53318e-20
	99053.6	9.09582e-22
	100352	9.7722e-20
	101515	1.78433e-19
	102718	8.30017e-20
	91834.9	1.06798e-14
	93878.5	5.40616e-17
	95843.3	2.60943e-20
	97595	1.1821e-19
	99084.1	1.28792e-21
	100381	1.20562e-19
	101543	2.2313e-19
	102746	1.05248e-19
	91796.5	9.55453e-15
	93840.4	4.75889e-17
	95805.6	2.64396e-20
	97558	1.06253e-19
	99047.8	1.07645e-21
	100346	1.08668e-19
	101508	1.99607e-19
	102711	9.34267e-20
	91838.5	1.14687e-14
	93881.8	5.91843e-17
	95846.2	2.38474e-20
	97597	1.26215e-19
	99085.2	1.49576e-21
	100381	1.28312e-19
	101542	2.3962e-19
	102746	1.14085e-19
	91792.5	1.00344e-14
	93836.1	5.0795e-17
	95800.9	2.45182e-20
	97552.6	1.11075e-19
	99041.7	1.21019e-21
	100338	1.13283e-19
	101500	2.0965e-19
	102704	9.8897e-20
	91842	1.17108e-14
	93885.1	6.17927e-17
	95848.9	1.97852e-20
	97598.6	1.27988e-19
	99085.8	1.66637e-21
	100380	1.29645e-19
	101541	2.44691e-19
	102745	1.17765e-19
	91788.3	1.00206e-14
	93831.7	5.17125e-17
	95796	2.08374e-20
	97546.8	1.10281e-19
	99035	1.30699e-21
	100331	1.12115e-19
	101492	2.09378e-19
	102696	9.96842e-20
	91845.5	1.14566e-14
	93888.2	6.19892e-17
	95851.4	1.47873e-20
	97600	1.24183e-19
	99085.9	1.79188e-21
	100379	1.25299e-19
	101539	2.39378e-19
	102744	1.1664e-19
	91784.2	9.58725e-15
	93827.2	5.05885e-17
	95791	1.61983e-20
	97540.8	1.04787e-19
	99027.9	1.36433e-21
	100322	1.06139e-19
	101483	2.00336e-19
	102687	9.64151e-20
	91849	1.07904e-14
	93891.3	6.00353e-17
	95853.8	9.74716e-21
	97601	1.15837e-19
	99085.5	1.86588e-21
	100377	1.16394e-19
	101537	2.25431e-19
	102742	1.11385e-19
	91780	8.83096e-15
	93822.6	4.77833e-17
	95785.9	1.13988e-20
	97534.4	9.57266e-20
	99020.3	1.38122e-21
	100314	9.65891e-20
	101474	1.8453e-19
	102678	8.99167e-20
	91852.4	9.81684e-15
	93894.2	5.63125e-17
	95856	5.40868e-21
	97601.6	1.0421e-19
	99084.7	1.88551e-21
	100375	1.04264e-19
	101533	2.05044e-19
	102739	1.02894e-19
	91775.7	7.85729e-15
	93818	4.37178e-17
	95780.5	7.09795e-21
	97527.7	8.43548e-20
	99012.3	1.35885e-21
	100304	8.47621e-20
	101463	1.64162e-19
	102668	8.11135e-20
	91855.7	8.64749e-15
	93897.1	5.12729e-17
	95858	2.25818e-21
	97602	9.06147e-20
	99083.4	1.85108e-21
	100371	9.02729e-20
	101529	1.80557e-19
	102736	9.21606e-20
	91771.4	6.76902e-15
	93813.2	3.88308e-17
	95775	3.72967e-21
	97520.6	7.18607e-20
	99003.7	1.30022e-21
	100294	7.19015e-20
	101452	1.41395e-19
	102658	7.09589e-20
	91859	7.38852e-15
	93899.9	4.5389e-17
	95859.8	4.84269e-22
	97602	7.62767e-20
	99081.6	1.76643e-21
	100368	7.56741e-20
	101524	1.5418e-19
	102732	8.01754e-20
	91767	5.65626e-15
	93808.4	3.35375e-17
	95769.3	1.47707e-21
	97513.3	5.92735e-20
	98994.7	1.2108e-21
	100283	5.90515e-20
	101441	1.18111e-19
	102647	6.0287e-20
	91862.3	6.13125e-15
	93902.5	3.9113e-17
	95861.5	3.36941e-24
	97601.7	6.22254e-20
	99079.3	1.63919e-21
	100363	6.14947e-20
	101519	1.27847e-19
	102728	6.78357e-20
	91762.6	4.59041e-15
	93803.4	2.82005e-17
	95763.4	3.00879e-22
	97505.6	4.73924e-20
	98985.2	1.09755e-21
	100271	4.70192e-20
	101428	9.58027e-20
	102636	4.98164e-20
	91865.4	4.94668e-15
	93905.1	3.28384e-17
	95863	5.32579e-22
	97601	4.92337e-20
	99076.6	1.47936e-21
	100358	4.84909e-20
	101513	1.0304e-19
	102723	5.58698e-20
	91758.1	3.62199e-15
	93798.4	2.31063e-17
	95757.4	1.99056e-24
	97497.5	3.67615e-20
	98975.2	9.68426e-22
	100259	3.63311e-20
	101415	7.55339e-20
	102624	4.00759e-20
	91868.6	3.88331e-15
	93907.6	2.688e-17
	95864.3	1.68573e-21
	97600	3.78013e-20
	99073.3	1.29851e-21
	100352	3.71298e-20
	101506	8.0782e-20
	102717	4.48306e-20
	91753.6	2.7808e-15
	93793.2	1.84607e-17
	95751.1	2.99408e-22
	97489.2	2.76791e-20
	98964.7	8.31706e-22
	100246	2.72622e-20
	101401	5.79319e-20
	102611	3.14107e-20
	91871.6	2.96829e-15
	93909.9	2.1463e-17
	95865.4	3.06725e-21
	97598.6	2.81731e-20
	99069.5	1.10852e-21
	100345	2.76238e-20
	101498	6.16455e-20
	102712	3.50654e-20
	91749	2.07878e-15
	93788	1.43896e-17
	95744.7	9.02428e-22
	97480.4	2.02368e-20
	98953.7	6.95171e-22
	100232	1.98782e-20
	101386	4.32495e-20
	102598	2.40013e-20
	91874.6	2.21035e-15
	93912.2	1.67241e-17
	95866.3	4.3453e-21
	97596.9	2.03856e-20
	99065.2	9.20314e-22
	100338	1.99768e-20
	101490	4.58095e-20
	102705	2.67514e-20
	91744.3	1.51389e-15
	93782.6	1.09469e-17
	95738.1	1.56447e-21
	97471.3	1.43701e-20
	98942.2	5.65424e-22
	100218	1.40903e-20
	101371	3.14448e-20
	102584	1.7887e-20
	91877.6	1.60419e-15
	93914.3	1.27209e-17
	95867	5.29363e-21
	97594.8	1.43208e-20
	99060.4	7.43053e-22
	100330	1.4048e-20
	101481	3.3163e-20
	102699	1.99139e-20
	91739.6	1.07455e-15
	93777.2	8.13053e-18
	95731.3	2.11257e-21
	97461.9	9.91117e-21
	98930.2	4.47458e-22
	100203	9.71289e-21
	101355	2.22735e-20
	102570	1.30075e-20
	91880.4	1.13515e-15
	93916.3	9.44763e-18
	95867.5	5.80304e-21
	97592.4	9.76567e-21
	99055	5.83379e-22
	100322	9.6083e-21
	101471	2.33962e-20
	102692	1.4466e-20
	91734.8	7.43634e-16
	93771.6	5.89706e-18
	95724.3	2.45406e-21
	97452.1	6.6391e-21
	98917.7	3.44485e-22
	100188	6.51289e-21
	101338	1.53748e-20
	102556	9.23221e-21
	91883.2	7.83418e-16
	93918.2	6.8523e-18
	95867.8	5.86677e-21
	97589.5	6.46269e-21
	99049.2	4.45351e-22
	100312	6.39317e-21
	101460	1.60891e-20
	102684	1.02602e-20
	91730	5.0192e-16
	93765.9	4.17755e-18
	95717.1	2.56607e-21
	97441.9	4.31845e-21
	98904.6	2.5798e-22
	100171	4.24903e-21
	101320	1.03463e-20
	102541	6.3976e-21
	91885.9	5.27461e-16
	93920	4.85429e-18
	95867.9	5.55201e-21
	97586.3	4.14865e-21
	99042.8	3.30544e-22
	100302	4.13891e-21
	101449	1.07869e-20
	102676	7.10534e-21
	91725.1	3.30498e-16
	93760.1	2.89089e-18
	95709.6	2.47517e-21
	97431.4	2.72667e-21
	98891	1.87901e-22
	100154	2.69749e-21
	101302	6.78843e-21
	102526	4.32926e-21
	91888.5	3.46536e-16
	93921.6	3.35918e-18
	95867.7	4.96628e-21
	97582.7	2.58178e-21
	99035.8	2.38511e-22
	100292	2.60729e-21
	101436	7.05263e-21
	102668	4.80495e-21
	91720.1	2.12357e-16
	93754.1	1.95439e-18
	95702	2.23542e-21
	97420.4	1.67043e-21
	98876.9	1.33095e-22
	100136	1.66658e-21
	101283	4.34358e-21
	102511	2.86107e-21
	91891.1	2.22203e-16
	93923.1	2.27092e-18
	95867.4	4.2278e-21
	97578.7	1.55635e-21
	99028.3	1.67295e-22
	100280	1.59828e-21
	101424	4.49705e-21
	102660	3.17407e-21
	91715	1.3317e-16
	93748	1.29094e-18
	95694.2	1.90869e-21
	97409.1	9.92261e-22
	98862.2	9.16692e-23
	100118	1.00211e-21
	101263	2.71074e-21
	102495	1.84694e-21
	91893.5	1.39082e-16
	93924.5	1.49987e-18
	95866.8	3.44148e-21
	97574.3	9.07883e-22
	99020.2	1.14055e-22
	100268	9.53406e-22
	101410	2.797e-21
	102652	2.04789e-21
	91709.8	8.15206e-17
	93741.9	8.33182e-19
	95686.1	1.55115e-21
	97397.4	5.71061e-22
	98847	6.13853e-23
	100099	5.86462e-22
	101242	1.65013e-21
	102479	1.16474e-21
	91895.9	8.49921e-17
	93925.8	9.67874e-19
	95866	2.68868e-21
	97569.5	5.11795e-22
	99011.5	7.55687e-23
	100255	5.53427e-22
	101395	1.69688e-21
	102643	1.29088e-21
	91704.5	4.87211e-17
	93735.5	5.25439e-19
	95677.8	1.20565e-21
	97385.3	3.1807e-22
	98831.2	3.99601e-23
	100079	3.3404e-22
	101221	9.79958e-22
	102463	7.17562e-22
	91898.2	5.07149e-17
	93926.9	6.10256e-19
	95864.9	2.02158e-21
	97564.2	2.78333e-22
	99002.3	4.86508e-23
	100241	3.12595e-22
	101380	1.00438e-21
	102635	7.94843e-22
	91699.2	2.84324e-17
	93729.1	3.23799e-19
	95669.3	8.995e-22
	97372.7	1.7123e-22
	98814.8	2.52836e-23
	100058	1.85171e-22
	101199	5.67786e-22
	102447	4.31921e-22
	91900.4	2.95521e-17
	93927.8	3.75956e-19
	95863.6	1.46608e-21
	97558.5	1.45707e-22
	98992.4	3.04292e-23
	100227	1.71794e-22
	101364	5.79967e-22
	102626	4.78168e-22
	91693.8	1.62036e-17
	93722.4	1.94987e-19
	95660.5	6.45955e-22
	97359.8	8.89401e-23
	98797.9	1.55467e-23
	100037	9.98939e-23
	101176	3.2096e-22
	102430	2.54013e-22
	91902.4	1.68184e-17
	93928.6	2.26309e-19
	95862	1.02734e-21
	97552.4	7.32092e-23
	98982	1.84855e-23
	100211	9.18495e-23
	101348	3.26752e-22
	102617	2.8104e-22
	91688.2	9.01886e-18
	93715.7	1.14741e-19
	95651.5	4.47468e-22
	97346.4	4.44729e-23
	98780.3	9.28795e-24
	100014	5.24382e-23
	101152	1.77038e-22
	102414	1.45961e-22
	91904.4	9.34906e-18
	93929.3	1.33113e-19
	95860.2	6.96562e-22
	97545.8	3.51643e-23
	98970.9	1.09047e-23
	100195	4.77704e-23
	101330	1.79626e-22
	102609	1.61375e-22
	91682.6	4.90316e-18
	93708.8	6.59779e-20
	95642.2	2.99531e-22
	97332.6	2.13457e-23
	98762.1	5.39005e-24
	99991.5	2.67826e-23
	101128	9.5283e-23
	102397	8.1952e-23
	91906.3	5.07651e-18
	93929.8	7.65065e-20
	95858.1	4.57536e-22
	97538.8	1.60589e-23
	98959.2	6.24421e-24
	100178	2.41641e-23
	101312	9.63497e-23
	102600	9.05368e-23
	91676.8	2.60386e-18
	93701.7	3.70788e-20
	95632.6	1.94026e-22
	97318.3	9.79524e-24
	98743.3	3.03771e-24
	99967.7	1.33076e-23
	101103	5.00405e-23
	102381	4.49587e-23
	91908	2.6929e-18
	93930.1	4.29684e-20
	95855.8	2.91424e-22
	97531.3	6.91847e-24
	98946.9	3.46923e-24
	100161	1.18863e-23
	101293	5.04311e-23
	102592	4.96218e-23
	91671	1.35089e-18
	93694.5	2.0361e-20
	95622.8	1.21765e-22
	97303.5	4.27403e-24
	98723.9	1.6619e-24
	99943.2	6.43156e-24
	101077	2.5645e-23
	102365	2.40983e-23
	91909.6	1.39559e-18
	93930.3	2.35803e-20
	95853.1	1.80147e-22
	97523.3	2.77874e-24
	98933.9	1.86954e-24
	100142	5.68461e-24
	101273	2.5757e-23
	102584	2.65717e-23
	91665	6.84708e-19
	93687.1	1.09255e-20
	95612.8	7.41068e-23
	97288.3	1.75935e-24
	98703.9	8.82303e-25
	99917.8	3.02292e-24
	101050	1.28254e-23
	102349	1.26203e-23
	91911.1	7.0665e-19
	93930.2	1.26439e-20
	95850.2	1.08155e-22
	97514.9	1.02099e-24
	98920.2	9.76513e-25
	100123	2.64265e-24
	101253	1.28371e-23
	102576	1.39014e-23
	91658.9	3.39078e-19
	93679.5	5.72923e-21
	95602.4	4.3773e-23
	97272.6	6.75248e-25
	98683.1	4.54323e-25
	99891.7	1.38145e-24
	101022	6.2594e-24
	102333	6.45802e-24
	91912.5	3.49614e-19
	93930	6.62539e-21
	95846.9	6.31008e-23
	97505.9	3.31992e-25
	98905.8	4.94019e-25
	100103	1.19396e-24
	101231	6.24364e-24
	102568	7.10448e-24
	91652.7	1.6407e-19
	93671.8	2.93588e-21
	95591.7	2.51152e-23
	97256.4	2.37092e-25
	98661.8	2.2677e-25
	99864.7	6.13711e-25
	100994	2.98137e-24
	102317	3.22846e-24
	91913.7	1.69014e-19
	93929.6	3.39204e-21
	95843.3	3.5795e-23
	97496.4	8.93357e-26
	98890.8	2.41877e-25
	100082	5.24123e-25
	101209	2.96347e-24
	102561	3.54721e-24
	91646.4	7.7574e-20
	93663.9	1.4701e-21
	95580.8	1.40031e-23
	97239.7	7.36765e-26
	98639.7	1.09638e-25
	99836.9	2.64986e-25
	100965	1.38577e-24
	102302	1.57688e-24
	91914.8	7.9843e-20
	93929	1.69705e-21
	95839.4	1.9752e-23
	97486.4	1.67691e-26
	98875	1.14489e-25
	100060	2.23504e-25
	101186	1.37277e-24
	102554	1.7302e-24
	91639.9	3.5841e-20
	93655.8	7.1938e-22
	95569.5	7.59165e-24
	97222.5	1.8948e-26
	98616.9	5.13036e-26
	99808.3	1.11173e-25
	100935	6.28637e-25
	102287	7.52457e-25
	91915.7	3.68587e-20
	93928.2	8.29636e-22
	95835.2	1.06072e-23
	97475.8	1.02434e-27
	98858.5	5.23174e-26
	100038	9.25654e-26
	101163	6.20643e-25
	102547	8.24436e-25
	91633.2	1.61823e-20
	93647.5	3.43992e-22
	95557.9	4.0038e-24
	97204.8	3.39932e-27
	98593.4	2.32087e-26
	99778.8	4.53102e-26
	100905	2.78313e-25
	102272	3.50784e-25
	91916.5	1.66287e-20
	93927.2	3.96318e-22
	95830.7	5.54513e-24
	97464.7	3.70615e-28
	98841.2	2.30404e-26
	100014	3.72297e-26
	101139	2.7387e-25
	102541	3.83734e-25
	91626.5	7.14024e-21
	93638.9	1.6073e-22
	95545.9	2.05508e-24
	97186.5	1.98469e-28
	98569.2	1.01373e-26
	99748.5	1.79361e-26
	100874	1.20263e-25
	102258	1.59754e-25
	91917.1	7.3316e-21
	93926	1.84979e-22
	95825.8	2.82282e-24
	97453	1.77042e-27
	98823.2	9.75925e-27
	99989.9	1.45396e-26
	101114	1.17954e-25
	102536	1.74485e-25
	91619.5	3.07897e-21
	93630.2	7.33853e-23
	95533.7	1.02687e-24
	97167.7	6.86386e-29
	98544.2	4.26723e-27
	99717.3	6.8952e-27
	100842	5.07259e-26
	102244	7.10784e-26
	91917.6	3.15922e-21
	93924.6	8.43716e-23
	95820.5	1.39978e-24
	97440.7	2.34436e-27
	98804.3	3.964e-27
	99964.7	5.51356e-27
	101088	4.95921e-26
	102531	7.75011e-26
	91612.4	1.29762e-21
	93621.3	3.27428e-23
	95521	4.99672e-25
	97148.2	3.13405e-28
	98518.4	1.72767e-27
	99685.2	2.574e-27
	100809	2.08838e-26
	102231	3.08929e-26
	91917.9	1.33048e-21
	93922.9	3.76013e-23
	95814.8	6.76279e-25
	97427.8	2.1165e-27
	98784.7	1.53806e-27
	99938.6	2.03045e-27
	101062	2.03556e-26
	102527	3.36265e-26
	91605.2	5.34487e-22
	93612.1	1.42749e-23
	95508	2.36849e-25
	97128.3	3.96706e-28
	98491.9	6.70753e-28
	99652.3	9.33037e-28
	100776	8.39282e-27
	102218	1.31166e-26
	91918	5.47654e-22
	93921	1.63745e-23
	95808.8	3.18413e-25
	97414.3	1.5695e-27
	98764.2	5.67151e-28
	99911.6	7.26555e-28
	101035	8.15773e-27
	102523	1.4253e-26
	91597.7	2.15175e-22
	93602.8	6.08178e-24
	95494.7	1.09388e-25
	97107.7	3.42365e-28
	98464.6	2.48817e-28
	99618.5	3.28469e-28
	100742	3.29322e-27
	102206	5.44034e-27
	91917.9	2.20331e-22
	93918.8	6.96784e-24
	95802.3	1.46133e-25
	97400.2	1.02646e-27
	98742.9	1.97266e-28
	99883.8	2.52769e-28
	101007	3.19211e-27
	102520	5.90132e-27
	91590.1	8.4669e-23
	93593.1	2.5318e-24
	95480.9	4.92359e-26
	97086.5	2.42698e-28
	98436.4	8.77055e-29
	99583.8	1.12362e-28
	100707	1.26162e-27
	102195	2.20435e-27
	91917.6	8.66424e-23
	93916.4	2.8973e-24
	95795.5	6.53844e-26
	97385.4	6.13067e-28
	98720.8	6.39989e-29
	99855	8.56186e-29
	100979	1.22e-27
	102518	2.38691e-27
	91582.3	3.25647e-23
	93583.3	1.02991e-24
	95466.7	2.16015e-26
	97064.6	1.51739e-28
	98407.4	2.91628e-29
	99548.2	3.73693e-29
	100672	4.71962e-28
	102185	8.72517e-28
	91917.2	3.33026e-23
	93913.8	1.17714e-24
	95788.2	2.85252e-26
	97370	3.41051e-28
	98697.7	1.90258e-29
	99825.3	2.8286e-29
	100951	4.55411e-28
	102517	9.43139e-28
	91574.4	1.22422e-23
	93573.1	4.09391e-25
	95452.2	9.23973e-27
	97042.1	8.66409e-29
	98377.5	9.04513e-30
	99511.7	1.21011e-29
	100636	1.72426e-28
	102175	3.37387e-28
	91916.5	1.25119e-23
	93910.8	4.67328e-25
	95780.4	1.21363e-26
	97353.9	1.78894e-28
	98673.7	5.02526e-30
	99794.7	9.1404e-30
	100921	1.66103e-28
	102516	3.6406e-28
	91566.2	4.4985e-24
	93562.8	1.59021e-25
	95437.2	3.85377e-27
	97019	4.60793e-29
	98346.7	2.57067e-30
	99474.3	3.82206e-30
	100600	6.1538e-29
	102166	1.27448e-28
	91915.6	4.59494e-24
	93907.6	1.81294e-25
	95772.2	5.03619e-27
	97337.1	8.91925e-29
	98648.8	1.10957e-30
	99763.3	2.90032e-30
	100892	5.92052e-29
	102516	1.37294e-28
	91557.8	1.61584e-24
	93552.1	6.03566e-26
	95421.7	1.56755e-27
	96995.2	2.31063e-29
	98315	6.49142e-31
	99436	1.18078e-30
	100563	2.14581e-29
	102157	4.70357e-29
	91914.5	1.64949e-24
	93904.1	6.87206e-26
	95763.6	2.0386e-27
	97319.5	4.251e-29
	98622.9	1.7629e-31
	99730.9	9.08481e-31
	100862	2.06289e-29
	102518	5.05879e-29
	91549.2	5.67333e-25
	93541.2	2.23856e-26
	95405.8	6.21908e-28
	96970.6	1.10145e-29
	98282.4	1.37034e-31
	99396.8	3.58211e-31
	100525	7.31242e-30
	102150	1.6959e-29
	91913.2	5.78819e-25
	93900.3	2.54541e-26
	95754.4	8.05022e-28
	97301.3	1.9448e-29
	98596.1	1.10672e-32
	99697.5	2.82827e-31
	100832	7.02854e-30
	102520	1.8211e-29
	91540.4	1.94717e-25
	93529.9	8.11292e-27
	95389.4	2.40687e-28
	96945.4	5.01928e-30
	98248.8	2.08159e-32
	99356.7	1.07276e-31
	100488	2.43601e-30
	102143	5.97413e-30
	91911.6	1.98547e-25
	93896.2	9.21273e-27
	95744.7	3.10176e-28
	97282.3	8.56678e-30
	98568.2	1.16778e-33
	99663.3	8.82295e-32
	100801	2.343e-30
	102523	6.40582e-30
	91531.3	6.53275e-26
	93518.4	2.87307e-27
	95372.5	9.08794e-29
	96919.4	2.1955e-30
	98214.2	1.2494e-33
	99315.7	3.1931e-32
	100450	7.93573e-31
	102138	2.05622e-30
	91909.8	6.65765e-26
	93891.8	3.25827e-27
	95734.5	1.16621e-28
	97262.5	3.64181e-30
	98539.3	6.83045e-33
	99628.2	2.783e-32
	100770	7.64424e-31
	102527	2.20178e-30
	91522	2.14253e-26
	93506.6	9.94255e-28
	95355.2	3.34765e-29
	96892.7	9.24652e-31
	98178.6	1.26049e-34
	99273.8	9.52383e-33
	100411	2.52922e-31
	102133	6.91561e-31
	91907.7	2.18227e-26
	93887	1.126e-27
	95723.8	4.27849e-29
	97241.9	1.4969e-30
	98509.3	7.72738e-33
	99592.2	8.95488e-33
	100739	2.44222e-31
	102531	7.39564e-31
	91512.5	6.86901e-27
	93494.5	3.36203e-28
	95337.2	1.20341e-29
	96865.2	3.75836e-31
	98142	7.04945e-34
	99230.9	2.87226e-33
	100373	7.88968e-32
	102129	2.27272e-31
	91905.4	6.99265e-27
	93881.9	3.80248e-28
	95712.5	1.532e-29
	97220.5	5.95776e-31
	98478.3	5.70969e-33
	99555.2	2.96069e-33
	100708	7.64603e-32
	102537	2.42769e-31
	91502.7	2.15281e-27
	93482	1.11092e-28
	95318.8	4.22144e-30
	96836.9	1.47704e-31
	98104.3	7.62522e-34
	99187.2	8.83707e-34
	100334	2.41017e-32
	102126	7.29922e-32
	91902.8	2.1904e-27
	93876.5	1.25472e-28
	95700.6	5.35373e-30
	97198.2	2.29875e-31
	98446.1	3.41619e-33
	99517.4	1.00984e-33
	100677	2.34728e-32
	102544	7.78846e-32
	91492.7	6.59577e-28
	93469.2	3.58695e-29
	95299.8	1.44532e-30
	96807.8	5.62094e-32
	98065.6	5.38724e-34
	99142.5	2.79362e-34
	100295	7.2149e-33
	102125	2.29096e-32
	91899.9	6.70733e-28
	93870.7	4.04569e-29
	95688.1	1.82617e-30
	97175.1	8.60742e-32
	98412.8	1.79036e-33
	99478.7	3.55304e-34
	100646	7.07139e-33
	102552	2.44232e-32
	91482.4	1.9755e-28
	93456.1	1.13173e-29
	95280.2	4.82948e-31
	96777.8	2.07377e-32
	98025.7	3.08189e-34
	99097	9.11112e-35
	100256	2.11785e-33
	102124	7.02769e-33
	91896.7	2.00783e-28
	93864.5	1.27472e-29
	95675	6.08034e-31
	97151.2	3.12991e-32
	98378.4	8.53513e-34
	99439.2	1.28408e-34
	100615	2.09222e-33
	102561	7.48609e-33
	91471.8	5.7842e-29
	93442.6	3.48927e-30
	95260	1.57511e-31
	96747	7.42439e-33
	97984.7	1.54443e-34
	99050.6	3.06517e-35
	100218	6.10062e-34
	102124	2.10721e-33
	91893.3	5.87579e-29
	93858	3.92462e-30
	95661.3	1.97631e-31
	97126.3	1.10617e-32
	98342.7	3.77974e-34
	99398.8	4.73195e-35
	100584	6.08496e-34
	102571	2.24319e-33
	91460.9	1.65566e-29
	93428.7	1.05123e-30
	95239.2	5.01485e-32
	96715.3	2.58161e-33
	97942.5	7.04011e-35
	99003.3	1.05923e-35
	100179	1.72594e-34
	102125	6.17611e-34
	91889.5	1.68096e-29
	93851.1	1.18072e-30
	95646.9	6.27092e-32
	97100.4	3.80136e-33
	98305.9	1.5752e-34
	99357.5	1.76224e-35
	100553	1.7412e-34
	102582	6.57116e-34
	91449.7	4.6329e-30
	93414.4	3.09479e-31
	95217.7	1.55856e-32
	96682.7	8.72405e-34
	97899.2	2.98116e-35
	98955.2	3.73236e-36
	100140	4.79987e-35
	102127	1.76955e-34
	91885.5	4.70124e-30
	93843.7	3.47111e-31
	95631.8	1.94259e-32
	97073.6	1.27097e-33
	98267.8	6.23054e-35
	99315.5	6.57274e-36
	100522	4.90661e-35
	102594	1.88206e-34
	91438.3	1.26736e-30
	93399.8	8.90295e-32
	95195.6	4.72887e-33
	96649.1	2.86674e-34
	97854.6	1.188e-35
	98906.2	1.32913e-36
	100102	1.31333e-35
	102130	4.95691e-35
	91881.1	1.28539e-30
	93836	9.97152e-32
	95616	5.87519e-33
	97045.9	4.13586e-34
	98228.5	2.3531e-35
	99272.7	2.43532e-36
	100492	1.36281e-35
	102607	5.2707e-35
	91426.5	3.38931e-31
	93384.7	2.50272e-32
	95172.8	1.40074e-33
	96614.6	9.1651e-35
	97808.8	4.49339e-36
	98856.5	4.74039e-37
	100063	3.53887e-36
	102135	1.35756e-35
	91876.3	3.43568e-31
	93827.8	2.7991e-32
	95599.4	1.73489e-33
	97017.1	1.31042e-34
	98187.8	8.52207e-36
	99229.1	8.90367e-37
	100462	3.73407e-36
	102621	1.44337e-35
	91414.4	8.86113e-32
	93369.3	6.8749e-33
	95149.3	4.05107e-34
	96579.1	2.85201e-35
	97761.7	1.6228e-36
	98805.9	1.67956e-37
	100026	9.39914e-37
	102140	3.63552e-36
	91871.3	8.97754e-32
	93819.1	7.67811e-33
	95582.1	5.00208e-34
	96987.2	4.04383e-35
	98145.9	2.9693e-36
	99184.8	3.19526e-37
	100433	1.01002e-36
	102636	3.86553e-36
	91401.9	2.26486e-32
	93353.3	1.84542e-33
	95125	1.14388e-34
	96542.6	8.64093e-36
	97713.4	5.61984e-37
	98754.6	5.87162e-38
	99988	2.46261e-37
	102146	9.52024e-37
	91865.8	2.29336e-32
	93810	2.05804e-33
	95564	1.40822e-34
	96956.3	1.21569e-35
	98102.7	9.97771e-37
	99139.8	1.1212e-37
	100404	2.69861e-37
	102652	1.01243e-36
	91389.1	5.65914e-33
	93337	4.84056e-34
	95100	3.15379e-35
	96505.1	2.54981e-36
	97663.8	1.87235e-37
	98702.6	2.01496e-38
	99951	6.36971e-38
	102154	2.438e-37
	91860.1	5.72732e-33
	93800.5	5.39055e-34
	95545	3.87115e-35
	96924.2	3.56141e-36
	98058.2	3.23991e-37
	99094.2	3.83612e-38
	100376	7.12543e-38
	102669	2.59364e-37
	91376	1.38242e-33
	93320.2	1.24071e-34
	95074.1	8.49033e-36
	96466.4	7.33017e-37
	97612.9	6.01646e-38
	98649.9	6.76106e-39
	99914.5	1.62744e-38
	102162	6.1063e-38
	91853.9	1.39832e-33
	93790.4	1.37968e-34
	95525.3	1.03916e-35
	96891	1.01686e-36
	98012.4	1.01828e-37
	99048	1.27739e-38
	100348	1.85947e-38
	102688	6.4989e-38
	91362.5	3.30141e-34
	93302.9	3.10759e-35
	95047.5	2.2319e-36
	96426.7	2.05347e-37
	97560.6	1.86821e-38
	98596.6	2.21212e-39
	99878.5	4.10911e-39
	102172	1.49587e-38
	91847.4	3.33751e-34
	93779.8	3.4506e-35
	95504.6	2.72397e-36
	96856.7	2.83032e-37
	97965.2	3.10153e-38
	99001.2	4.13457e-39
	100321	4.79664e-39
	102707	1.59299e-38
	91348.6	7.7077e-35
	93285.1	7.60589e-36
	95020	5.72921e-37
	96385.8	5.60674e-38
	97507.1	5.61483e-39
	98542.7	7.04395e-40
	99843.2	1.02542e-39
	102182	3.5844e-39
	91840.4	7.78773e-35
	93768.8	8.43295e-36
	95483	6.9727e-37
	96821.1	7.68065e-38
	97916.7	9.1652e-39
	98954	1.29981e-39
	100295	1.22268e-39
	102727	3.81973e-39
	91334.4	1.75923e-35
	93266.8	1.81907e-36
	94991.6	1.43613e-37
	96343.7	1.49233e-38
	97452.2	1.63543e-39
	98488.2	2.18028e-40
	99808.5	2.52958e-40
	102194	8.4017e-40
	91833.1	1.7765e-35
	93757.1	2.01391e-36
	95460.4	1.74298e-37
	96784.2	2.03244e-38
	97866.9	2.62996e-39
	98906.3	3.96731e-40
	100270	3.07837e-40
	102749	8.96078e-40
	91319.7	3.92552e-36
	93248.1	4.25129e-37
	94962.3	3.51545e-38
	96300.4	3.87272e-39
	97396	4.62154e-40
	98433.3	6.55486e-41
	99774.5	6.16576e-41
	102207	1.92657e-40
	91825.3	3.96177e-36
	93745	4.69963e-37
	95436.9	4.25493e-38
	96746.1	5.24503e-39
	97815.7	7.33441e-40
	98858.2	1.17543e-40
	100245	7.6515e-41
	102772	2.05663e-40
	91304.7	8.56331e-37
	93228.7	9.70882e-38
	94932	8.40364e-39
	96255.8	9.79996e-40
	97338.4	1.26816e-40
	98377.8	1.91317e-41
	99741.3	1.48467e-41
	102221	4.322e-41
	91817.2	8.63738e-37
	93732.2	1.07165e-37
	95412.4	1.01437e-38
	96706.6	1.32022e-39
	97763.3	1.98888e-40
	98809.8	3.38024e-41
	100221	1.87595e-41
	102795	4.61847e-41
	91289.2	1.82624e-37
	93208.8	2.16662e-38
	94900.8	1.96182e-39
	96210	2.4185e-40
	97279.6	3.38209e-41
	98322	5.42057e-42
	99708.8	3.5287e-42
	102235	9.48634e-42
	91808.6	1.84096e-37
	93718.9	2.38787e-38
	95386.8	2.36166e-39
	96665.7	3.24116e-40
	97709.6	5.2482e-41
	98761.1	9.43577e-42
	100198	4.53263e-42
	102820	1.01482e-41
	91273.3	3.80756e-38
	93188.4	4.72465e-39
	94868.5	4.4726e-40
	96162.8	5.82113e-41
	97219.4	8.77096e-42
	98265.9	1.49068e-42
	99677.2	8.27335e-43
	102251	2.03721e-42
	91799.5	3.83598e-38
	93704.9	5.1991e-39
	95360.1	5.36957e-40
	96623.4	7.76258e-41
	97654.6	1.34807e-41
	98712.3	2.55712e-42
	100176	1.0783e-42
	102846	2.18198e-42
	91257	7.76074e-39
	93167.3	1.00675e-39
	94835.2	9.95798e-41
	96114.2	1.3668e-41
	97158	2.2132e-42
	98209.6	3.97938e-43
	99646.4	1.91178e-43
	102268	4.28087e-43
	91790	7.814e-39
	93690.3	1.10614e-39
	95332.2	1.1924e-40
	96579.7	1.8138e-41
	97598.5	3.37251e-42
	98663.3	6.72871e-43
	100155	2.52334e-43
	102873	4.59083e-43
	91240.2	1.54644e-39
	93145.6	2.09623e-40
	94800.8	2.16532e-41
	96064.2	3.13055e-42
	97095.3	5.43677e-43
	98153	1.03131e-43
	99616.5	4.34944e-44
	102286	8.80216e-44
	91779.9	1.55609e-39
	93675.1	2.29957e-40
	95303.2	2.58579e-41
	96534.4	4.13495e-42
	97541.1	8.21979e-43
	98614.2	1.71954e-43
	100134	5.80206e-44
	102901	9.452e-44
	91223	3.01253e-40
	93123.3	4.265e-41
	94765.2	4.5979e-42
	96012.7	6.99477e-43
	97031.5	1.30066e-43
	91769.5	3.02943e-40
	93659.2	4.67131e-41
	95273	5.4765e-42
	96487.5	9.19725e-43
	97482.7	1.95244e-43
	98565.1	4.26828e-44
	91205.2	5.73708e-41
	93100.4	8.47911e-42
	94728.5	9.53601e-43
	95959.6	1.52493e-43
	91758.5	5.76559e-41
	93642.5	9.27178e-42
	95241.5	1.13272e-42
	96439	1.99624e-43
	91187	1.06813e-41
	93076.7	1.64725e-42
	94690.6	1.93141e-43
	91747	1.07275e-41
	93625.2	1.79821e-42
	95208.7	2.28823e-43
	91168.3	1.9441e-42
	93052.4	3.1269e-43
	91734.9	1.95119e-42
	93607.1	3.40763e-43
	91149.1	3.45918e-43
	91722.4	3.46946e-43

## Sheet: C-X_Diabatic
	91931.3	1.28448e-15
	94027.7	5.05459e-17
	91923.5	1.25866e-15
	94020	4.95871e-17
	91935.2	2.51794e-15
	94031.5	9.88481e-17
	91919.7	2.41773e-15
	94016.1	9.51383e-17
	91939.2	3.6282e-15
	94035.4	1.41922e-16
	91915.9	3.41371e-15
	94012.2	1.34009e-16
	91943.2	4.55445e-15
	94039.2	1.7731e-16
	91912.2	4.19907e-15
	94008.4	1.64257e-16
	91947.3	5.25292e-15
	94043	2.03282e-16
	91908.5	4.74571e-15
	94004.5	1.84758e-16
	91951.4	5.70021e-15
	94046.9	2.19007e-16
	91904.9	5.04632e-15
	94000.6	1.95284e-16
	91955.5	5.89386e-15
	94050.7	2.24547e-16
	91901.2	5.11296e-15
	93996.7	1.96452e-16
	91959.7	5.8509e-15
	94054.5	2.20768e-16
	91897.7	4.97354e-15
	93992.8	1.8949e-16
	91963.9	5.60328e-15
	94058.4	2.09121e-16
	91894.1	4.6673e-15
	93989	1.76109e-16
	91968.2	5.19439e-15
	94062.2	1.91504e-16
	91890.6	4.2397e-15
	93985.1	1.58232e-16
	91972.4	4.67199e-15
	94066	1.69936e-16
	91887.2	3.73678e-15
	93981.2	1.37773e-16
	91976.7	4.08443e-15
	94069.9	1.46367e-16
	91883.7	3.20109e-15
	93977.3	1.16435e-16
	91981.1	3.4752e-15
	94073.7	1.22533e-16
	91880.3	2.66888e-15
	93973.4	9.56471e-17
	91985.4	2.88074e-15
	94077.6	9.97963e-17
	91876.9	2.1679e-15
	93969.6	7.64396e-17
	91989.8	2.32839e-15
	94081.5	7.91414e-17
	91873.6	1.71704e-15
	93965.7	5.94842e-17
	91994.2	1.83624e-15
	94085.3	6.11473e-17
	91870.3	1.3269e-15
	93961.9	4.51013e-17
	91998.7	1.41368e-15
	94089.2	4.6048e-17
	91866.9	1.00102e-15
	93958.1	3.33338e-17
	92003.1	1.06297e-15
	94093.2	3.38171e-17
	91863.7	7.37544e-16
	93954.2	2.40255e-17
	92007.6	7.80901e-16
	94097.1	2.42248e-17
	91860.4	5.30947e-16
	93950.5	1.68925e-17
	92012	5.60671e-16
	94101.1	1.69329e-17
	91857.1	3.73561e-16
	93946.7	1.15887e-17
	92016.5	3.93538e-16
	94105.1	1.15496e-17
	91853.9	2.56937e-16
	93942.9	7.75951e-18
	92021	2.70101e-16
	94109.1	7.68982e-18
	91850.7	1.72804e-16
	93939.2	5.07182e-18
	92025.5	1.81309e-16
	94113.2	4.99801e-18
	91847.4	1.13666e-16
	93935.5	3.23616e-18
	92030	1.1905e-16
	94117.3	3.17142e-18
	91844.2	7.31365e-17
	93931.9	2.01617e-18
	92034.4	7.64779e-17
	94121.4	1.96478e-18
	91841	4.60393e-17
	93928.3	1.2265e-18
	92038.9	4.80716e-17
	94125.6	1.18849e-18
	91837.7	2.83574e-17
	93924.7	7.28584e-19
	92043.4	2.95689e-17
	94129.9	7.01949e-19
	91834.5	1.70928e-17
	93921.2	4.22618e-19
	92047.8	1.78005e-17
	94134.2	4.04807e-19
	91831.2	1.00834e-17
	93917.7	2.39397e-19
	92052.2	1.04886e-17
	94138.5	2.27924e-19
	91827.9	5.82215e-18
	93914.3	1.32409e-19
	92056.6	6.04961e-18
	94143	1.25288e-19
	91824.6	3.29065e-18
	93911	7.15116e-20
	92060.9	3.41582e-18
	94147.5	6.72313e-20
	91821.3	1.82074e-18
	93907.7	3.77093e-20
	92065.2	1.8882e-18
	94152	3.52151e-20
	91817.9	9.86265e-19
	93904.5	1.94132e-20
	92069.5	1.02189e-18
	94156.7	1.8002e-20
	91814.5	5.23068e-19
	93901.3	9.7559e-21
	92073.7	5.41515e-19
	94161.4	8.98014e-21
	91811.1	2.71618e-19
	93898.2	4.78514e-21
	92077.9	2.80973e-19
	94166.2	4.37035e-21
	91807.6	1.38108e-19
	93895.3	2.29041e-21
	92082	1.42761e-19
	94171.1	2.07455e-21
	91804	6.87636e-20
	93892.4	1.06963e-21
	92086	7.103e-20
	94176.2	9.60256e-22
	91800.4	3.35267e-20
	93889.6	4.87239e-22
	92090	3.46092e-20
	94181.3	4.33268e-22
	91796.7	1.60083e-20
	93886.9	2.16432e-22
	92093.9	1.65144e-20
	94186.5	1.90487e-22
	91793	7.48557e-21
	93884.3	9.37194e-23
	92097.7	7.71755e-21
	94191.9	8.1569e-23
	91789.1	3.42806e-21
	93881.8	3.95445e-23
	92101.4	3.5323e-21
	94197.4	3.40001e-23
	91785.2	1.53756e-21
	93879.5	1.62519e-23
	92105	1.58339e-21
	94203	1.37872e-23
	91781.2	6.75436e-22
	93877.2	6.50193e-24
	92108.5	6.95191e-22
	94208.8	5.43449e-24
	91777.2	2.90611e-22
	93875.1	2.53065e-24
	92111.9	2.98962e-22
	94214.7	2.08039e-24
	91773	1.22469e-22
	93873.2	9.5744e-25
	92115.2	1.25926e-22
	94220.7	7.72551e-25
	91768.7	5.05531e-23
	93871.4	3.51812e-25
	92118.4	5.19538e-23
	94226.9	2.77907e-25
	91764.2	2.04393e-23
	93869.7	1.25407e-25
	92121.5	2.0996e-23
	94233.3	9.6677e-26
	91759.7	8.09469e-24
	93868.2	4.33037e-26
	92124.4	8.31147e-24
	94239.8	3.24517e-26
	91755	3.14023e-24
	93866.9	1.44606e-26
	92127.2	3.22286e-24
	94246.5	1.04803e-26
	91750.2	1.19329e-24
	93865.7	4.65946e-27
	92129.8	1.22417e-24
	94253.5	3.24388e-27
	91745.3	4.44183e-25
	93864.7	1.44456e-27
	92132.3	4.55492e-25
	94260.5	9.5738e-28
	91740.2	1.61968e-25
	93863.9	4.29258e-28
	92134.6	1.6602e-25
	94267.8	2.67396e-28
	91735	5.78537e-26
	93863.3	1.21613e-28
	92136.7	5.92774e-26
	94275.3	6.99016e-29
	91729.6	2.02435e-26
	93862.8	3.2608e-29
	92138.7	2.0734e-26
	94283.1	1.68061e-29
	91724	6.93907e-27
	93862.6	8.18347e-30
	92140.5	7.1042e-27
	94291	3.6051e-30
	91718.2	2.33008e-27
	93862.6	1.88888e-30
	92142	2.38465e-27
	94299.1	6.50198e-31
	91712.3	7.66482e-28
	93862.8	3.88999e-31
	92143.4	7.8414e-28
	94307.5	8.52883e-32
	91706.2	2.47006e-28
	93863.3	6.73509e-32
	92144.6	2.52603e-28
	94316.2	4.62905e-33
	91699.9	7.79786e-29
	93864	8.48238e-33
	92145.6	7.97174e-29
	94325	2.96847e-34
	91693.4	2.41173e-29
	93864.9	4.42006e-34
	92146.4	2.46457e-29
	94334.1	1.6569e-33
	91686.6	7.3072e-30
	93866	2.72137e-35
	92146.9	7.46481e-30
	94343.5	1.57483e-33
	91679.7	2.16899e-30
	93867.4	1.45834e-34
	92147.3	2.21502e-30
	94353.2	9.67786e-34
	91672.5	6.30744e-31
	93869.1	1.33081e-34
	92147.3	6.4389e-31
	94363.1	4.80939e-34
	91665.1	1.79693e-31
	93871	7.85204e-35
	92147.2	1.83377e-31
	94373.3	2.09533e-34
	91657.5	5.01526e-32
	93873.2	3.74644e-35
	92146.8	5.11649e-32
	94383.8	8.31708e-35
	91649.6	1.37137e-32
	93875.7	1.56717e-35
	92146.1	1.39857e-32
	94394.5	3.07267e-35
	91641.5	3.67376e-33
	93878.5	5.97268e-36
	92145.2	3.74545e-33
	94405.6	1.07049e-35
	91633.1	9.64184e-34
	93881.5	2.11861e-36
	92144	9.8269e-34
	94417	3.54751e-36
	91624.5	2.47924e-34
	93884.9	7.08715e-37
	92142.6	2.526e-34
	94428.6	1.12489e-36
	91615.6	6.24551e-35
	93888.5	2.25492e-37
	92140.9	6.36145e-35
	94440.6	3.42779e-37
	91606.4	1.54146e-35
	93892.5	6.86542e-38
	92138.9	1.56956e-35
	94452.9	1.00706e-37
	91597	3.72736e-36
	93896.8	2.00879e-38
	92136.6	3.79422e-36
	94465.5	2.85957e-38
	91587.3	8.8304e-37
	93901.4	5.66656e-39
	92134	8.9861e-37
	94478.5	7.86246e-39
	91577.3	2.04961e-37
	93906.3	1.54491e-39
	92131.1	2.08514e-37
	94491.7	2.0967e-39
	91567	4.66094e-38
	93911.5	4.07875e-40
	92128	4.74043e-38
	94505.4	5.42941e-40
	91556.4	1.03847e-38
	93917	1.04439e-40
	92124.5	1.05592e-38
	94519.3	1.36664e-40
	91545.5	2.26693e-39
	92120.7	2.30438e-39
	94533.6	3.34674e-41
	91534.4	4.84846e-40
	92116.7	4.92722e-40
	91522.9	1.01599e-40
	92112.3	1.03225e-40

## Sheet: E-X
	92887	7.44499e-16
	92883.2	1.0861e-15
	92891	1.08613e-15
	92875.5	3.42444e-16
	92883.3	1.71239e-15
	92894.9	1.37002e-15
	92871.7	6.30128e-16
	92883.4	2.20574e-15
	92898.9	1.57578e-15
	92867.9	8.45807e-16
	92883.5	2.53785e-15
	92903	1.69225e-15
	92864.2	9.81517e-16
	92883.7	2.69975e-15
	92907.1	1.71846e-15
	92860.5	1.03858e-15
	92883.9	2.70099e-15
	92911.2	1.66264e-15
	92856.9	1.02612e-15
	92884.2	2.56603e-15
	92915.3	1.54016e-15
	92853.3	9.58659e-16
	92884.5	2.3289e-15
	92919.5	1.37048e-15
	92849.7	8.53333e-16
	92884.8	2.02747e-15
	92923.7	1.17427e-15
	92846.2	7.27231e-16
	92885.1	1.6976e-15
	92928	9.70489e-16
	92842.7	5.95345e-16
	92885.5	1.36993e-15
	92932.3	7.74701e-16
	92839.2	4.69298e-16
	92886	1.06711e-15
	92936.6	5.97918e-16
	92835.8	3.56834e-16
	92886.4	8.03336e-16
	92941	4.4655e-16
	92832.4	2.62059e-16
	92887	5.84941e-16
	92945.4	3.22925e-16
	92829.1	1.86078e-16
	92887.5	4.12286e-16
	92949.8	2.26246e-16
	92825.7	1.27853e-16
	92888.1	2.81458e-16
	92954.3	1.53636e-16
	92822.5	8.5062e-17
	92888.7	1.86208e-16
	92958.8	1.01159e-16
	92819.2	5.48283e-17
	92889.3	1.1942e-16
	92963.4	6.46037e-17
	92816	3.42537e-17
	92890	7.42771e-17
	92968	4.00281e-17
	92812.8	2.07495e-17
	92890.8	4.4813e-17
	92972.6	2.4067e-17
	92809.7	1.21913e-17
	92891.5	2.62337e-17
	92977.2	1.40452e-17
	92806.6	6.94933e-18
	92892.3	1.49053e-17
	92981.9	7.95714e-18
	92803.6	3.8441e-18
	92893.2	8.22017e-18
	92986.7	4.37691e-18
	92800.5	2.0639e-18
	92894	4.40149e-18
	92991.4	2.33792e-18
	92797.5	1.07574e-18
	92894.9	2.28829e-18
	92996.2	1.21279e-18
	92794.6	5.44383e-19
	92895.9	1.15537e-18
	93001.1	6.11069e-19
	92791.7	2.6752e-19
	92896.9	5.66535e-19
	93005.9	2.99076e-19
	92788.8	1.27675e-19
	92897.9	2.69852e-19
	93010.9	1.422e-19
	92785.9	5.91834e-20
	92898.9	1.24862e-19
	93015.8	6.56863e-20
	92783.1	2.6649e-20
	92900	5.61246e-20
	93020.8	2.9481e-20
	92780.4	1.16571e-20
	92901.1	2.45118e-20
	93025.8	1.28566e-20
	92777.6	4.95394e-21
	92902.3	1.04016e-20
	93030.9	5.44823e-21
	92774.9	2.04556e-21
	92903.5	4.28875e-21
	93036	2.2436e-21
	92772.3	8.20694e-22
	92904.7	1.71846e-21
	93041.1	8.97898e-22
	92769.6	3.19964e-22
	92906	6.69154e-22
	93046.3	3.49233e-22
	92767.1	1.21222e-22
	92907.3	2.53212e-22
	93051.5	1.32016e-22
	92764.5	4.46328e-23
	92908.6	9.31285e-23
	93056.7	4.85041e-23
	92762	1.59708e-23
	92910	3.329e-23
	93062	1.73217e-23
	92759.5	5.55433e-24
	92911.4	1.15663e-23
	93067.3	6.01267e-24
	92757.1	1.87748e-24
	92912.9	3.90602e-24
	93072.6	2.02876e-24
	92754.7	6.16838e-25
	92914.4	1.28212e-24
	93078	6.65414e-25
	92752.3	1.96988e-25
	92915.9	4.09107e-25
	93083.4	2.12158e-25
	92749.9	6.115e-26
	92917.5	1.26895e-25
	93088.9	6.57573e-26
	92747.6	1.8452e-26
	92919.1	3.82619e-26
	93094.4	1.98132e-26
	92745.4	5.41251e-27
	92920.7	1.12153e-26
	93099.9	5.80367e-27
	92743.2	1.54337e-27
	92922.4	3.19584e-27
	93105.5	1.65271e-27
	92741	4.27833e-28
	92924.1	8.8532e-28
	93111.1	4.57555e-28
	92738.8	1.15296e-28
	92925.8	2.38432e-28
	93116.7	1.23154e-28
	92736.7	3.02062e-29
	92927.6	6.24289e-29
	93122.4	3.22274e-29
	92929.4	1.58917e-29
