# Supplementary material for: Theoretical investigation of the A1Π–X1Σ+, B1Σ+–X1Σ+, C1Σ+–X1Σ+, and E1Π–X1Σ+ transitions of the CO molecule
Source: Royal Society of Chemistry journal article supplement (doi:10.1039/d4cp03418j), 2024-12-27
Supplement: d4cp03418j2.zip [file d4cp03418j2.zip]

## **Potential Energy Curves fitting information**

### **A<sup>1</sup>Π state**

#### **Effective Morse Oscillator parameters**

| Coefficient | Value              |
|-------------|--------------------|
| Te          | 65070.0            |
| Ae          | 87750.0            |
| re          | 1.245              |
| a0          | 3.437826775        |
| a1          | -1.4390756979      |
| a2          | -18.079875456      |
| a3          | 147.989719729      |
| a4          | 281.162932559      |
| a5          | -3079.766474149    |
| a6          | 1480.412775250     |
| a7          | 23516.882196800    |
| a8          | -35414.969313453   |
| a9          | -52709.832600099   |
| a10         | 123675.624624069   |
| a11         | 15990.0029343340   |
| a12         | -152667..669384484 |
| a13         | 79371.67           |

### **B<sup>1</sup>Σ state**

#### **Ninth-order polynomial Parameters**

| Coefficient | Value     |
|-------------|-----------|
| a0          | 4304348   |
| a1          | -8314711  |
| a2          | 4057177   |
| a3          | -11335826 |
| a4          | 30634333  |
| a5          | -19765572 |
| a6          | -14433848 |
| a7          | 24485256  |
| a8          | -11299152 |
| a9          | 1766956   |

## **C<sup>1</sup>Σ state**

### **Ninth-order polynomial Parameters**

| Coefficient | Value     |
|-------------|-----------|
| a0          | -91253.72 |
| a1          | 6406024   |
| a2          | -11587182 |
| a3          | 451236.9  |
| a4          | 3891456   |
| a5          | 8674098   |
| a6          | -3333987  |
| a7          | -14040139 |
| a8          | 13032092  |
| a9          | -3298812  |
